1 **Bacillus anthracis chain length, a virulence determinant, is regulated by a**  
2 **transmembrane Ser/Thr protein kinase PrkC**

3

4 Neha Dhasmana<sup>1¶</sup>, Nishant Kumar<sup>1¶</sup>, Aakriti Gangwal<sup>2¶</sup>, Chetkar Chandra Keshavam<sup>2¶</sup>, Lalit  
5 K. Singh<sup>1¶</sup>, Nitika Sangwan<sup>2</sup>, Payal Nashier<sup>2</sup>, Sagarika Biswas<sup>1</sup>, Andrei P. Pomerantsev<sup>3</sup>,  
6 Stephen H Leppla<sup>3</sup>, Yogendra Singh<sup>1,2#</sup>, and Meetu Gupta<sup>1#</sup>

7

8

9 <sup>1</sup>CSIR-Institute of Genomics and Integrative Biology, Mall Road, Delhi, India

10 <sup>2</sup>Department of Zoology, University of Delhi, Delhi, India

11 <sup>3</sup>Microbial Pathogenesis Section, Laboratory of Parasitic Diseases, National Institute of  
12 Allergy and Infectious Diseases, National Institutes of Health, Bethesda, Maryland, USA

13

14

15 # Corresponding author

16 E-mail: meetu.gupta@igib.in, yinghdu@gmail.com

17

18

19

20

21

22 ¶ These authors contributed equally to this work.

23

24

25

## 26 **Abstract**

27 Anthrax is a zoonotic disease caused by *Bacillus anthracis*, a spore-forming pathogen  
28 that displays a chaining phenotype. It has been reported that in a mouse infection model,  
29 systemic inoculation with longer bacterial chains caused blockade in lung capillaries. The  
30 blockade resulted in increased pathophysiological consequences viz, hypoxia and lung tissue  
31 injury. Hence, chaining acts as a virulence factor and molecules that regulate the chaining  
32 phenotype can be the potential drug targets. In this study, we have identified the  
33 serine/threonine protein kinase of *B. anthracis*, PrkC, localized at the bacteria-host interface,  
34 as a determinant of bacterial chain length. *In vitro*, *prkC* disruption strain (BAS  $\Delta prkC$ ) grew  
35 as shorter chains throughout the bacterial growth cycle as observed through phase-contrast and  
36 scanning electron microscopy. Since molecules such as BslO, a septal murein hydrolase, that  
37 catalyzes daughter cell separation and Sap, an S-layer structural protein required for the septal  
38 localization of BslO, are known to influence chain length, a comparative analysis to determine  
39 their levels was done through western-blot analysis. Both BslO and Sap were found to be  
40 upregulated in BAS  $\Delta prkC$  at the majority of the time points. Additionally, PrkC disruption  
41 was observed to have a significant effect on bacterial growth and cell wall thickness. In BAS  
42  $\Delta prkC$  strain, a decrease in the cell wall thickness and an increase in the multi-septa formation  
43 was observed through transmission electron and confocal microscopy respectively. Altogether,  
44 we show that PrkC disruption affected chaining phenotype, cell growth and cell wall thickness  
45 and also report that the associated molecules were de-regulated. Through this work, we show  
46 for the first time that the chaining phenotype is regulated by PrkC, a transmembrane kinase  
47 with a sensor domain. During infection, PrkC may regulate the chaining phenotype through the  
48 identified signaling mechanism.

49

## 50 **Authors summary**

51 *B. anthracis*, a spore-forming pathogen is the causative agent of anthrax, a zoonotic  
52 disease that primarily affects livestock and wildlife. Humans are at risk of contracting this  
53 disease through exposure to spores generated by infected animals. In the past, *B.*  
54 *anthracis* spores have been used as a bioterror agent. Hence, there has been a continuous effort  
55 to understand the biology of this pathogen to develop both therapeutic and prophylactic  
56 treatment. Various virulence factors that are essential for *B. anthracis* pathogenesis have been  
57 identified. The ability of *B. anthracis* to grow in chains acts as a virulence factor. Longer  
58 bacterial chains are reported to cause blockade of lung capillaries in the mouse infection model.  
59 In this study, we have shown that the disruption of the lone serine/threonine protein kinase,  
60 PrkC, localized at the bacteria-host interface leads to the shortening of the bacterial chains. We  
61 have seen that the depletion of PrkC results in an increase in the levels of the proteins  
62 responsible for de-chaining. Also, we have analyzed the effect of the disruption on cell growth,  
63 bacterial cell wall and septa formation. Since PrkC is a surface localized kinase with an  
64 extracellular domain that lacks homology to human proteins, it can be a target for new drugs.  
65 Disruption of PrkC activity and hence the longer chains *in vivo* may prevent  
66 pathophysiological consequences associated with the capillary blockade.

67

## 68 **Introduction**

69 Bacteria exhibit diverse shapes and morphologies, the result of long evolutionary  
70 processes that select genotypes best suited for bacterial survival. Apart from the variation in  
71 shape, bacteria display multi-cellular structures such as aggregates, biofilms, and  
72 chains/filaments [1, 2]. *Bacillus anthracis*, the Gram-positive spore-forming pathogen of  
73 grazing mammals, and the etiological agent of anthrax grows as chains of rod-shaped cells [3-  
74 6]. In the environment, *B. anthracis* persists primarily as metabolically inert oblong spores.  
75 Germination happens in the presence of an optimal signal within the host [7]. Emerging

76 evidence indicates that spores can germinate, multiply and persist even outside their vertebrate  
77 host, in the presence of a nutrient-rich environment in the root rhizosphere and simpler  
78 biological systems such as earthworm, housefly, and amoebae [6, 8-11].

79 *B. anthracis* spores can infect humans through three routes – gastrointestinal,  
80 inhalational, and cutaneous [7, 12-14]. The highest mortality rates are seen in inhalational  
81 anthrax [15]. Multiple factors act as virulence determinants [16-18]. However, the secreted  
82 binary exotoxins (lethal toxin and edema toxin) and the anti-phagocytic poly- $\gamma$ -D-glutamic acid  
83 capsule, encoded by the virulence plasmids pXO1 and pXO2, respectively, act as the primary  
84 virulence factors [7, 19, 20]. The exotoxins perturb host immune responses and cause toxemia,  
85 and the capsule prevents engulfment by phagocytes, resulting in septicemia [20, 21].

86 Among other factors that play a role in virulence, the bacterial chaining phenotype has  
87 been shown to contribute significantly [4, 5]. During initial stages of infection, *B. anthracis*  
88 spores phagocytosed by macrophages, germinate, and grow in chains before causing cell  
89 rupture [22]. In mice, the high pathogenicity of systemically inoculated *B. anthracis* strain  
90 making capsule but not the toxins (encapsulated but nontoxinogenic strain) was linked to chain  
91 length-dependent blockade of alveolar capillaries leading to hypoxia, lung tissue injury, and  
92 death [4, 5]. Of note, the lung is the terminal organ targeted by *B. anthracis*, irrespective of the  
93 route of infection [5, 23, 24]. These studies indicate that the chaining phenotype presents a  
94 survival advantage to *B. anthracis* within its host during both early and late stages of infection.

95 Intrigued by the relevance of this morphotype in the biology of *Bacillus* species, various  
96 groups have tried to identify the mechanisms controlling bacterial chain length in both  
97 pathogenic and non-pathogenic strains [25-33]. In *B. anthracis*, one of the determinants of  
98 bacterial chain length is the septal peptidoglycan hydrolase, BslO (*bacillus surface layer O*).  
99 BslO is a *Bacillus S-layer* associated protein (BSL) with *N*-acetylglucosaminidase activity that  
100 catalyzes daughter cell separation [28]. Restrictive deposition of BslO to the septal region is,

101 in turn, attributed to sequential coverage of the cell wall by the primary S-layer proteins (SLPs),  
102 Sap (surface array protein) and EA1 (extractable antigen 1) [27]. SLPs and BSLs associate  
103 with the pyruvylated secondary cell wall polysaccharides (SCWP) through their conserved S-  
104 layer homology domain (SLH) [34, 35]. While several enzymes that influence the chaining  
105 phenotype through their role in synthesis/modification of SCWPs and hence the attachment of  
106 SLPs to SCWPs have been identified in *B. anthracis* [35, 36], a sensory molecule with a  
107 potential to regulate the chaining phenotype, possibly through regulation of one of these  
108 factors, remains unknown.

109 Through this work, we identify *B. anthracis* PrkC, the only serine/threonine protein  
110 kinase (STPK) localized at the bacteria-host interface, as a determinant of bacterial chain  
111 length. We show that the *B. anthracis* Sterne 34F2 *prkC* mutant strain (BAS  $\Delta prkC$ ) is not able  
112 to attain a chaining phenotype throughout the bacterial growth cycle. Both BslO and Sap are  
113 found to be upregulated in BAS  $\Delta prkC$ , which probably creates a condition that favors de-  
114 chaining. Additionally, PrkC is also shown to influence the bacterial cell division, possibly  
115 through the regulation of the cytoskeletal protein, FtsZ. Through this work, we propose that  
116 PrkC, a transmembrane kinase with a sensor domain, perceives growth permissive signals and  
117 maintains the levels of the primary proteins involved in de-chaining to regulate the chaining  
118 phenotype.

119

## 120 **Results**

121 STPKs, earlier thought to be limited to eukaryotes, are now identified as integral  
122 components of the bacterial systems with a definite role in bacterial survival and pathogenesis  
123 [37]. In *B. anthracis*, three STPKs have been characterized, namely PrkC (BAS 3713), PrkD  
124 (BAS 2152), and PrkG (BAS 2037) [38-40]. Among these, PrkC is the only membrane-  
125 associated protein kinase [39, 41]. The extracellular ligand-binding motif of PrkC is composed

126 of peptidoglycan binding PASTA (penicillin-binding proteins and Ser/Thr kinase-associated)  
127 repeats. Interaction of the PASTA domain with peptidoglycan was first demonstrated for PrkC,  
128 wherein it was shown to interact with peptidoglycan fragments generated by neighboring  
129 growing cells, thereby triggering germination of *B. subtilis* and *B. anthracis* spores [42]. Apart  
130 from a role in germination, *B. subtilis* PrkC has been implicated in stationary phase processes,  
131 cell wall metabolism, cell division, sporulation, germination, and biofilm formation [41, 43-  
132 47].

133

### 134 ***prkC* disruption results in bacteria with shorter chain length**

135       Previously, our group had shown that *B. anthracis* PrkC-mediated processes play an  
136 essential role in germination and biofilm formation [48, 49]. Some of the components of the  
137 PrkC-mediated signaling cascade leading to these processes were identified [48, 49]. Work  
138 done by other groups implicated *B. subtilis* PrkC in later stages of bacterial growth and  
139 germination [41-44]. Even though *prkC* is expressed maximally during the logarithmic phase  
140 of *in vitro* growth, *prkC* deletion has never been reported to result in any apparent defect in  
141 morphology, viability, or growth during this phase in either *B. subtilis* or *B. anthracis* [38-41,  
142 43, 44, 50]. PrkC is, however, recognized as an infection-specific kinase and is critical for *B.*  
143 *anthracis* survival in macrophages [39, 40].

144       While working on the *B. anthracis* Sterne 34F2 *prkC* mutant strain (BAS  $\Delta$ *prkC*), we  
145 observed that logarithmic cultures of BAS  $\Delta$ *prkC* allowed to stand at room temperature formed  
146 a compact pellet whereas the parental wild type strain (BAS WT) did not (Fig 1A). The absence  
147 of PrkC was leading to the formation of a compact pellet. In a study on a *B. anthracis* *bslO*  
148 mutant strain, Anderson et al. had shown that compact pellets were formed when bacteria grew  
149 as shorter chains while loose pellets were formed when bacteria exhibited extensive chaining  
150 [28]. This suggested that the absence of PrkC might be leading to the shortening of bacterial

151 chains. To validate this, exponentially growing BAS WT and BAS  $\Delta prkC$  were visualized  
152 under a phase-contrast microscope. As shown in Fig 1B, disruption of *prkC* resulted in bacteria  
153 growing as shorter chains, and this phenotype was reversed in a *prkC*-complemented strain  
154 (BAS  $\Delta prkC::prkC$ ). Further, to determine if *prkC* disruption resulted in a defect in the cell  
155 morphology, viz; bulging, shrinking, or changes in cell width or shape, BAS WT, and BAS  
156  $\Delta prkC$  were examined by scanning electron microscope (SEM). However, as seen in Fig 1C,  
157 no morphological defect was apparent, apart from the shortening of bacterial chains, indicating  
158 that the *prkC* disruption influenced only chain length. In a study on PknB, a membrane-  
159 localized PASTA kinase from *Mycobacterium tuberculosis*, depletion, or over-expression of  
160 the kinase was shown to have a significant effect on bacterial morphology leading to cell death  
161 [51].

### 162 **Effect of *prkC* disruption on chaining morphotype during different phases of bacterial** 163 **growth**

164 If PrkC is the sensor molecule required for maintaining the chaining phenotype, its  
165 absence in the BAS  $\Delta prkC$  strain would result in shorter chains throughout the bacterial growth  
166 cycle. To examine this and to provide a basis for our experiments, we first monitored the growth  
167 of the BAS WT strain through the entire growth cycle (Fig 2A). To determine growth stage-  
168 specific changes in chaining phenotype, culture aliquots were taken out at indicated time points  
169 and observed under a phase-contrast microscope. As seen in Figs 2C and 3, BAS WT exhibited  
170 extensive chaining until  $\sim$  OD ( $A_{600nm}$ ) 3.0, at 4 hr, after which a sudden shortening of bacterial  
171 chains was observed. The average chain length at 4hr was measured as 115.90 ( $\pm$ 46.271 S.D.,  
172  $n = 50$ )  $\mu$ m while at 5 hr it shortened to 63.53 ( $\pm$ 20.1150 S.D.,  $n = 50$ )  $\mu$ m (Fig 3). Interestingly,  
173 this time point correlated with the end of the exponential phase and the start of the deceleration  
174 phase (Fig 2A), a stage where bacterial replication rate starts decreasing owing to nutrient  
175 deprivation and accumulation of metabolic by-products [52]. Next, to determine the effect of

176 *prkC* disruption on chaining phenotype, similar growth curve analysis, and chain length  
177 determinations/measurements were carried out as described above (Figs 2B, 2C, and 3). As  
178 shown in Figs 2C and 3, BAS  $\Delta prkC$  grew as shorter chains throughout the growth cycle. Of  
179 note, we did observe some chaining in the BAS  $\Delta prkC$  cultures during the lag phase ( $t = 2h$ ,  
180 Fig 2C), which could be due to an insufficient number of the de-chaining molecule(s)  
181 synthesized at this stage. In the presence of PrkC, synthesis of these molecule(s) is probably  
182 downregulated to allow bacteria to grow as chains. These results indicate that PrkC senses  
183 growth permissive signal(s) and regulates the levels of molecules associated with de-chaining  
184 to maintain the long-chain phenotype, a morphology found during nutrient abundance [3, 28].

185

#### 186 **PrkC regulates the expression of Sap, EA1 and BsIO**

187 In *B. anthracis*, Sap, and then EA1 sequentially form monomeric paracrystalline bi-  
188 dimensional surface S-layers during exponential and stationary growth-phase, respectively [27,  
189 53]. The saturating presence of Sap and EA1 on the cell wall confines the S-layer associated  
190 protein BsIO (with a similar SLH domain) to the septal region [27]. Disruption of *sap* has been  
191 shown to cause chain length elongation mainly because in the absence of Sap, BsIO is no longer  
192 restricted to the septal region and is hence incapable of carrying out murein hydrolysis  
193 effectively [27]. To understand whether PrkC maintains chaining phenotype through  
194 modulating the levels of Sap, BsIO, and EA1, their expression levels were determined at the  
195 indicated time points (Figs 2A and 2B) in the BAS WT and BAS  $\Delta prkC$  strains. As shown in  
196 Fig 4A, *prkC* disruption resulted in the upregulation of Sap at most of the time points for which  
197 the samples were collected. In BAS WT, a sharp increase in expression was observed toward  
198 the end of the exponential growth phase {~ OD ( $A_{600nm}$ ) 3, Time – 4 hr}, Figs 2A and 4A.  
199 Interestingly, the initial time points when the Sap expression was low were also the time points  
200 where long chains were observed (Time – 2 hr and 3 hr), Figs 2C, 3 and 4A. However, in BAS



201  $\Delta prkC$  strain, Sap levels were found to be higher than the BAS WT strain even at the initial  
202 time points (Time – 2 hr and 3 hr), Fig 4A. This probably formed the reason for the de-chaining  
203 observed in the BAS  $\Delta prkC$  strain from the beginning of the growth cycle. These results are in  
204 agreement with the previous report, where the absence of Sap was shown to result in a long  
205 chain phenotype [27].

206         Next, we wanted to determine the levels of BsIO in the BAS WT and BAS  $\Delta prkC$   
207 strains. Experiments were conducted in a similar manner, as described above. Interestingly, we  
208 observed a stable expression of BsIO throughout the growth cycle in BAS WT (Fig 4B). As  
209 per our understanding, this is the first report where the levels of BsIO have been determined at  
210 various stages of bacterial growth. Previous studies have conclusively established the role of  
211 BsIO in de-chaining and have identified it as the primary murein hydrolase driving the de-  
212 chaining process [27, 28]. As observed for Sap,  $prkC$  disruption resulted in the upregulation of  
213 BsIO at most of the time points for which the samples were collected (Fig 4B). The results  
214 obtained for Sap and BsIO indicated that an increase in the levels of Sap and BsIO in the  
215 absence of PrkC might create a condition that is most suitable for de-chaining. Increased Sap  
216 would restrict BsIO to the septal region, which would carry out de-chaining, and an increase in  
217 the levels of BsIO would further add to this effect.

218         Further, we determined the levels of EA1, another structural S-layer protein, that shows  
219 its presence as the culture approaches the stationary phase [27, 53]. As seen in Fig 4C, EA1  
220 levels in BAS  $\Delta prkC$  were downregulated at most of the time points for which the samples  
221 were collected. Since Sap acts as a transcriptional repressor of *eag* [27, 53], this decrease can  
222 be due to the increased levels of Sap in the BAS  $\Delta prkC$  strain (Fig 4A).

223         Altogether, these results indicate that during bacterial growth, PrkC maintains an  
224 optimum level of BsIO, Sap, and EA1 to maintain the chaining phenotype.

225

226 ***prkC* disruption results in decreased cell wall width and cell septa thickness and increased**  
227 **multi-septa formation**

228 Through the course of these experiments, we observed that BAS  $\Delta prkC$  growth curve  
229 was not superimposable with BAS WT (Figs 2A and 2B). This result was in contradiction with  
230 the earlier reports wherein *B. anthracis prkC* disruption was shown have no effect on the  
231 bacterial growth *in vitro* [39, 40, 48]. To validate our observation, we carried out a comparative  
232 growth curve analysis with BAS WT and BAS  $\Delta prkC$  until extended stationary phase.  
233 Interestingly, as shown in Fig 5A, BAS  $\Delta prkC$  strain showed an attenuated replication rate  
234 throughout the bacterial growth cycle. To identify the reason(s) for the observed defect, we  
235 carried out microscopic analysis at the ultrastructural level, and both BAS WT and BAS  $\Delta prkC$   
236 were subjected to transmission electron microscopy. Interestingly, at the ultrastructural level,  
237 an apparent decrease in the cell wall width and septal thickness was observed in the *prkC*  
238 disruption strain (mid-log phase) (Figs 5B and 5C). Additionally, we also observed an increase  
239 in multi-septa formation in the *prkC* disruption strain during later stages of bacterial growth  
240 through both confocal and transmission electron microscopy (Figs 6A, 6B and 6C). PASTA  
241 domain containing kinases from other bacterial species have been shown to play a role in the  
242 regulation of cell division machinery and cell wall homeostasis [54]. We surmise that similar  
243 signaling mechanisms may be operational in *B. anthracis* as well.

244 FtsZ is a cytoskeletal protein of cell division machinery that localizes at mid-cell and  
245 forms the initial Z ring. It also serves as the scaffold for further assembly of cell-division  
246 machinery [55]. STPKs from other bacterial systems have been shown to phosphorylate and  
247 regulate the activity of FtsZ [56, 57]. Our initial results suggest that *ftsZ* is constantly  
248 upregulated in the *prkC* disruption strain (Fig 6D). This probably formed the reason for an  
249 increase in the multi-septa formation observed in the *prkC* disruption strain, possibly due to  
250 mis-localization of FtsZ. Further experiments are underway to delineate the PrkC-mediated

251 signaling cascades, disruption of which results in the observed defects in cell division, cell wall  
252 homeostasis, and multi-septa formation.

253

## 254 **Discussion**

255 Chaining phenotype acts as a virulence factor in several bacterial pathogens [1, 4, 58-  
256 63]. In *Legionella pneumophila*, chaining morphology helps the pathogen evade phagosomal  
257 killing by interfering with phagosomal morphogenesis [60]. In *Streptococcus pneumoniae*,  
258 bacteria growing as long chains display increased attachment and adherence to epithelial cell  
259 surfaces, possibly via multivalent binding sites [59]. *Bacillus cereus*, a close relative of *B.*  
260 *anthracis* and a cause of food-borne and opportunistic infections in humans, also displays a  
261 chaining phenotype and has been shown to attach to the invertebrate gut through long filaments  
262 [62, 63]. In *B. anthracis*, in a mice model, chain-length-dependent physical sequestration of an  
263 encapsulated nontoxinogenic strain in lung capillaries is thought to result in hypoxia and  
264 associated lung tissue injury, leading to host death [4, 5].

265 In this study on *B. anthracis* Sterne strain, we identify a transmembrane  
266 serine/threonine protein kinase, PrkC, with an extracellular sensory PASTA domain, as a  
267 determinant of chaining phenotype. Interestingly, PrkC homologs are found in all the above-  
268 mentioned chain-forming pathogens (S1 Fig). Though PASTA kinases do not necessarily carry  
269 out similar signaling processes across various bacterial species [37, 64], it would be worthwhile  
270 to explore whether PASTA kinases of these pathogens also form the primary messenger  
271 molecule for maintaining chaining phenotype as reported for *B. anthracis* in this study.  
272 Notably, PASTA motifs are unique to bacteria, and their absence in eukaryotes makes them an  
273 attractive drug target [64].

274 *B. anthracis* PrkC is a key messenger molecule that plays a central role in various  
275 cellular processes including infection in macrophages, biofilm formation and germination [39,

276 40, 42, 48]. We report for the first time that *prkC* disruption results in the attenuation of growth  
277 rate during *in vitro* culturing (Fig 5A). Interestingly, none of the previous studies have reported  
278 an attenuation of growth on the disruption of *prkC* during *in vitro* growth, as observed in this  
279 study. We believe that this discrepancy could be due to the difference in the subtype of the  
280 Sterne strain used [*B. anthracis* Sterne strain 7702 [39, 40] vs. *B. anthracis* Sterne strain 34F2  
281 {used in this study}] or differential growth conditions.

282 In this study, we show that in the *prkC* disruption strain, S-layer protein, Sap, and septal  
283 *N*-acetylglucosaminidase, BslO, are upregulated. On the contrary, stationary phase S-layer  
284 protein, Ea1, shows downregulation (Fig 4). S-layers are found in many bacterial species where  
285 they form a cell cover and play important roles such as - 1) act like exoskeleton/mechanical  
286 barrier, 2) function like a scaffold for surface molecules, 3) mediate adhesion, leading to auto-  
287 aggregation and coaggregation, 4) work as a molecular sieve and, 5) act as an  
288 immunomodulatory factor [65, 66]. In *B. anthracis*, S-layer is made up of two primary  
289 structural proteins, Sap and EA1, and several S-layer-associated proteins called BSLs, that  
290 carry out diverse roles [67]. Previous studies have shown that Sap levels rise until the onset of  
291 the stationary phase, and the EA1 amount is minimal during the logarithmic phase [53]. As Sap  
292 levels go down, EA1 is upregulated and replaces Sap as the primary constituent of S-layer in  
293 the stationary phase. Both Sap and EA1 act as the transcriptional repressors of the *eag* gene  
294 [53]. Our results also show a gradual decline in the Sap levels from late log phase onwards {~  
295 OD (*A*<sub>600nm</sub>) 5.0-6.0, Time – 6-8} (Figs 4A and 2A). EA1 levels, as reported earlier, were  
296 minimal during lag phase and early exponential phase but increased gradually till the last point  
297 of measurement (Fig 4C). Interestingly, BslO levels remained constant throughout the growth  
298 cycle in BAS WT (Fig 4B), which implies that the stage/growth phase-dependent de-chaining  
299 in wild-type strain is primarily dependent on its localization, which in turn is controlled by the  
300 levels of Sap on the cell surface. Upregulation of both Sap and BslO in BAS  $\Delta$ *prkC* strain

301 would create a condition that would favor de-chaining from the initial stages of bacterial  
302 growth. Altogether, our results suggest that PrkC keeps a check on the levels of Sap, BslO, and  
303 Ea1 during optimum growth conditions, thereby maintaining the chaining phenotype.

304 In conclusion, through this study, we show that PrkC, the transmembrane kinase of *B.*  
305 *anthracis* with a sensor PASTA domain, regulates chaining phenotype. Since the disruption  
306 strain of PrkC shows decreased virulence in mice model of pulmonary anthrax [39], it will be  
307 relevant to see if the observed effect is due to a difference in the chaining phenotype as shown  
308 in this report. If proven so, therapeutic intervention against PrkC could help in controlling  
309 bacterial chain size and hence the lung tissue injury and its pathophysiological consequences.

310

## 311 **Materials and methods**

### 312 **Bacterial strains and growth conditions**

313 *Escherichia coli* DH5 $\alpha$  (Invitrogen) and SCS110 (Stratagene) strains were used for  
314 cloning and BL21-DE3 (Invitrogen) strain was used for expression of recombinant proteins.  
315 The final concentrations of the antibiotics used were: 100  $\mu$ g/ml ampicillin, 25  $\mu$ g/ml  
316 kanamycin and 150  $\mu$ g/ml spectinomycin. LB broth (Difco) with appropriate antibiotic was  
317 used to grow bacterial cultures at 37°C with proper aeration (1:5 head space) and constant  
318 shaking at 200 rpm. *B. anthracis* Sterne strain 34F2 (BAS WT) was obtained from Colorado  
319 Serum Company and *prkC* gene knockout strain (BAS  $\Delta$ *prkC*) was a gift from Jonathan  
320 Dworkin, Department of Microbiology, Columbia University, USA. The details of the primers,  
321 plasmids and strains used in the study are provided as supporting information (S1 Table – S3  
322 Table).

323

### 324 **Generation of *prkC* complement strain**

325 The *prkC* gene and its promoter gene sequence were amplified using the primers –  
326 (P13-P16). These genes were subsequently cloned in the shuttle vector pYS5 [68] and the  
327 positive clone obtained was transformed in SCS110 cells prior to electroporation in the BAS  
328  $\Delta$ *prkC* strain using Bio-Rad Gene Pulser Xcell (2.5 kV, 400 $\Omega$ , 25  $\mu$ F using 0.2 cm Bio-Rad  
329 Gene Pulser cuvette). The complemented strain thus obtained after the screening was named  
330 BAS  $\Delta$ *prkC*::*prkC*.

331

### 332 **Cloning, gene expression, and protein purification**

333 Genes for *sap*, *eag*, *bslO* and *groEL* were amplified using BAS genomic DNA as  
334 template and sequence specific primers (P5 and P6 - *sap*, P7 and P8 - *eag*, P9 and P10 - *groEL*,  
335 P11 and P12 - *bslO*). The amplified products thus obtained for *sap*, *eag* and *groEL* were cloned  
336 in pProExHtc vector (Invitrogen), while *bslO* gene was cloned in pET28a vector (Invitrogen).  
337 The resulting plasmids encodes His<sub>6</sub> tagged fusion proteins. Plasmids were transformed into *E.*  
338 *coli* BL21 (DE3) and proteins were purified using affinity chromatography, as described  
339 described [69]. Briefly, overnight grown cultures were diluted in LB broth (1:50) with  
340 appropriate antibiotic - ampicillin (100  $\mu$ g/ml) or kanamycin (25  $\mu$ g/ml) and grown at 37°C,  
341 200 rpm. Cultures were induced with 1 mM IPTG at OD ( $A_{600nm}$ ) of 0.5 - 0.8 and incubated  
342 overnight at 16°C. After this cells were pelleted and re-suspended in sonication buffer [50 mM  
343 Tris-HCl (pH-8.5), 5 mM –  $\beta$ -mercaptoethanol, 1 mM Phenylmethylsulfonyl fluoride (PMSF),  
344 1X protease inhibitor cocktail (Roche Applied Science, U.S.A.) and 300 mM NaCl] and  
345 sonicated (9 cycles- 20% amplitude, 10 sec on and 30 sec off). The recombinant proteins were  
346 purified by affinity purification using Ni-nitrilotriacetic acid (NTA) column and the final  
347 elution was done using 200 mM imidazole. Protein estimation was done using Pierce BCA  
348 Protein Assay kit (Thermo Fisher Scientific).

349

350 **Generation of polyclonal antibodies against GroEL and BsIO in mice, and Sap and EA1**  
351 **in rabbit**

352 For generation of polyclonal antibodies 30 µg of purified protein (GroEL and BsIO)  
353 was used for injecting in three BALB/c mice and 500 µg of purified protein (Sap and EA1) was  
354 used for injecting in three rabbits for each protein. Antigens were emulsified in complete  
355 Freund's adjuvant (Sigma-Aldrich) in 1:1 ratio before subcutaneous injection in the animals.  
356 Production of antibody was stimulated at an interval of 21 days followed by two booster  
357 injections of 15 µg protein emulsified in incomplete Freund's adjuvant for mice and three  
358 booster injections of 250 µg protein emulsified in incomplete Freund's adjuvant for rabbits.  
359 Animals were bled to collect serum 14 days after the final injection and the antibody titer was  
360 calculated by ELISA and used accordingly for further experiments.

361

362 **Growth Kinetics**

363 BAS WT and BAS  $\Delta prkC$  strains were grown overnight in LB broth at 37 °C, 200 rpm.  
364 These overnight grown cultures were taken as inoculum for growth kinetics experiments. The  
365 secondary cultures were initiated at starting OD ( $A_{600nm}$ ) of 0.001 in triplicates in LB broth at  
366 37 °C, 200 rpm (New Brunswick Innova 42 Incubator Shaker). Following this the OD ( $A_{600nm}$ )  
367 was monitored until around 64 hr at indicated intervals (Fig 5A).

368 For lysate preparation and microscopy, the secondary cultures for both the strains were initiated  
369 similarly in triplicates from overnight grown cultures at starting OD ( $A_{600nm}$ ) of 0.001. Culture  
370 samples were collected at different time points (2 hr, 3 hr, 4 hr, 5 hr, 6 hr, 7 hr, 8 hr, 9 hr, 10  
371 hr, 14 hr, 18 hr, 22 hr, 26 hr, and 30 hr) for analysis and the corresponding OD ( $A_{600nm}$ ) was  
372 plotted (Fig 2A and 2B).

373

374 **Phase Contrast Microscopy**

375 For phase-contrast microscopy 1 ml of culture samples from growing cells of BAS WT  
376 and BAS  $\Delta prkC$  were collected at different time points as mentioned in above section. The  
377 cells were pelleted and washed thrice with phosphate buffer (pH 7.4) and resuspended in 100  
378  $\mu$ L buffer. The cells were then observed under a 100 x/1.4 oil DIC objective of Zeiss Axio  
379 Imager Z2 Upright Microscope. Images were captured using Axiocam 506 color camera  
380 equipped to the microscope and processed in ZEN 2 Pro software.

381

### 382 **Quantitative Immunoblot Analysis**

383 For immunoblot analysis, 5-10 ml bacillus culture was collected at different time points  
384 (2 hr, 3 hr, 4 hr, 5 hr, 6 hr, 7 hr, 8 hr, 9 hr, 10 hr, 14 hr, 18 hr, 22 hr, 26 hr, and 30 hr) from  
385 BAS WT and BAS  $\Delta prkC$  cultures. The cell pellet obtained was washed with PBS buffer and  
386 re-suspended in 1 ml lysis buffer [200 mM Tris-HCl (pH 7.5), 1 mM EDTA, 150 mM NaCl, 1  
387 mM PMSF, 5% glycerol, and 1X protease inhibitor cocktail (Roche Applied Science)]. After  
388 this, sonication of the bacterial pellets resuspended in the buffer was done (9 cycles- 20%  
389 amplitude, 10 sec on and 30 sec off). Protein estimation was done using Pierce BCA Protein  
390 Assay kit (Thermo Fisher Scientific). 5  $\mu$ g protein lysate sample of each time point was  
391 prepared using SDS sample buffer containing 250 mM Tris-HCl (pH 6.8), 30% (v/v) glycerol,  
392 10% SDS, 10 mM DTT and 0.05% (w/v) Bromophenol Blue. Samples were heated for 5 min  
393 at 95°C prior to loading on 12% polyacrylamide gels followed by transfer onto NC membrane  
394 (Millipore). 3% BSA in phosphate buffer saline (PBS) with 0.05% Tween 20 (PBST) was used  
395 for blocking the membranes overnight at 4°C. This was followed by washing with PBST (3  
396 washes of 5 mins each). Membranes were then probed with antibodies specific to Sap protein  
397 (1:50,000) or BsIO protein (1:10,000) or EA1 protein (1:50,000) for 1 hr followed by washes  
398 with PBST (5 washes of 5 min each). After this anti-rabbit IgG secondary antibody (for Sap  
399 and EA1) or anti-mouse IgG secondary antibody (for BsIO) conjugated with horseradish



400 peroxide (1:10,000 - Cell Signaling Technology) was used and the blots were incubated for  
401 another 60 min, followed by 3 PBST washings of 10 min each. Finally, SuperSignal West Pico  
402 PLUS Chemiluminescent substrate (Thermo Fisher Scientific) was used to detect the signal  
403 and it was visualised and quantified with the luminescent image analyser (Amersham Imager  
404 600 or ImageLab6.0.1). The blots were then stripped using stripping buffer and probed  
405 similarly using anti-GroEL (1:50,000) and anti-mice IgG secondary antibody conjugated with  
406 horseradish peroxide (1:10,000 - Cell Signaling Technology) for normalising the loading  
407 pattern. GroEL was used as a loading control as PrkC has been shown to modify GroEL without  
408 affecting its total expression level [48].

409

#### 410 **RNA extraction and Quantitative Real Time PCR**

411 BAS WT and BAS  $\Delta prkC$  strains were grown to mid-log and stationary phase in  
412 triplicates for RNA extraction following hot lysis method as described previously [70-72] with  
413 a few modifications. Cells were harvested at 6,000 x g for 15 min and the cell pellet was  
414 washed once with PBS and resuspended in 500  $\mu$ L TRIzol® (Invitrogen) and frozen at -80°C  
415 until ready for further processing. The frozen samples were thawed in ice and RNA was  
416 extracted following the hot lysis method. Briefly the samples were mixed with 400  $\mu$ L of buffer  
417 (50 mM Tris (pH 8.0), 1% SDS and 1mM EDTA) and 400  $\mu$ L of zirconia beads treated with  
418 DEPC water. This suspension was incubated at 65 °C for 15 min with rigorous intermittent  
419 vortexing after every 5 min. Suspension was cooled in ice and mixed well with 100  $\mu$ L of  
420 chloroform/ml of TRIzol. Separation of the aqueous phase containing RNA was done by  
421 centrifugation at 9500  $\times$  g for 15 min at 4 °C. RNA was precipitated from the aqueous phase  
422 by adding LiCl<sub>2</sub> (0.5M) and 3X ice-cold isopropanol followed by 2 hr incubation at -80°C.  
423 RNA pellet thus obtained by centrifugation at 16,000  $\times$  g for 20 min (4°C) was washed using  
424 70% ethanol (Merck) and resuspended in nuclease-free water after air drying. RNA sample  
425 was then treated with DNase (Ambion) to remove any residual DNA contamination (according

426 to the manufacturer's protocol). RNeasy mini kit (Qiagen) was used to obtain pure RNA using  
427 the manufacturer's protocol. cDNA was prepared using 1 µg of RNA using first-strand cDNA  
428 synthesis kit (Thermo Fisher) according to the protocol provided by the manufacturer. To  
429 analyse the expression of *ftsZ* gene, 2 µL of cDNA (diluted 10 times) was used for each time  
430 point (mid-log and stationary) along with gene-specific primer and SYBR Green master mix  
431 (Roche) in a 10 µL reaction according to the manufacturer's protocol. Reactions were run in  
432 triplicates along with no template control in a LightCycler® 480 Instrument II (Roche).  
433 The *rpoB* gene encoding for DNA-directed RNA polymerase subunit beta was used as  
434 housekeeping control [73]. All the primers used were sequence-specific with a PCR product of  
435 120 bp size.

436

### 437 **Scanning Electron Microscopy**

438 BAS WT and BAS  $\Delta$ *prkC* strains were grown in LB broth at 37°C and harvested at  
439 mid-log phase and processed [74]. Briefly the bacterial culture was harvested at 12,000 x g at  
440 4°C, and the pellet thus obtained was washed thrice using 0.1 M sodium phosphate buffer (pH-  
441 7.4). Karnovsky's fixative (2.5% glutaraldehyde (TAAB) + 2% paraformaldehyde (Sigma) in  
442 0.1 M sodium phosphate buffer pH 7.4) was used to fix the bacterial samples overnight at 4°C.  
443 Fixed cells were again washed using sodium phosphate buffer and this step was repeated thrice  
444 to remove any residual fixative from the pellet. After this the pellets were again fixed using 1%  
445 osmium tetroxide for 20 min at 4°C. Sequential dehydration was then done for 30 min each  
446 using a range of ethanol (Merck) (30%, 50%, 70%, 80%(X 2), 90%, 100%(X 3) at 4°C. A  
447 critical point drying technique was used for drying the samples followed by gold coating of 10  
448 nm using an aluminium stubs coated with agar sputter. Images were captured using Zeiss  
449 Scanning Electron Microscope EVO LS15 at 20 KV. Comprehensive imaging, processing and  
450 analysis were performed with Smart SEM software [75].

451

## 452 **Transmission Electron Microscopy**

453           BAS WT and BAS  $\Delta prkC$  strains were grown in LB Broth at 37°C and harvested at  
454 mid-log and stationary phase and processed. Briefly the bacterial culture was harvested at  
455 12,000 x g at 4°C, and the pellet thus obtained was washed thrice using 0.1 M sodium  
456 phosphate buffer (pH 7.4). Karnovsky's fixative containing 2.5% glutaraldehyde (TAAB) and  
457 2% paraformaldehyde (Sigma) was made in 0.1 M sodium phosphate buffer pH 7.4 and was  
458 used for primary fixation of the cells overnight at 4°C. Fixed cells were again washed using  
459 sodium phosphate buffer and this step was repeated thrice to remove any residual fixative from  
460 the pellet. After this the pellets were again fixed using 1% osmium tetroxide for 20 min at 4°C.  
461 Sequential dehydration was then done for 30 min each using a range of acetone (Merck) (30%,  
462 50%, 70%, 80% (X 2), 90%, 100% (X 3) at 4°C. For the clearing process and removal of  
463 dehydrating agent, absolute xylene (Merck) was used and the samples were subjected for bullet  
464 preparation using araldite resin mixture (TAAB). Following this infiltration was done by  
465 raising the concentration of the embedding medium and lowering the concentration of clearing  
466 agents gradually. The final bullets were prepared by curing at 55°C for 24 hr and for 48 hr at  
467 65°C. Sectioning were obtained using Leica UC6 ultra-cut to make the grids which were then  
468 observed in FEI Tecnai G<sup>2</sup> Spirit at 200 KV [75].

469

## 470 **Confocal microscopy to analyse multi septa formation**

471           FM4-64 labelling was used to visualise multi-septa formation in BAS WT and BAS  
472  $\Delta prkC$  strains using fluorescence. LB agarose pads were prepared using AB gene frame  
473 (Fischer Scientific; 17\*54 mm) on frosted glass slides (Corning Micro slide Frosted; 75\*25  
474 mm). To prepare agarose pad 3% low melting agarose (Sigma) were poured on these slides and  
475 left for solidification until further use. 1  $\mu$ L of exponentially growing cultures of BAS WT and

476 BAS  $\Delta prkC$  strains diluted to an OD ( $A_{600nm}$ ) = 0.035 were spread evenly on the agarose pads  
477 along with 1 $\mu$ g/ml FM4-64 dye for staining the cell membrane. Images were captured using  
478 Leica TCS SP8 confocal laser scanning microscope at 3 hr and 12 hr using 63x oil immersion  
479 objective [76].

480

### 481 **Phylogenetic Analysis**

482 The amino acid sequences of PrkC protein in different pathogens: *Bacillus anthracis*  
483 Sterne, *Bacillus cereus*, *Legionella pneumophila* and *Streptococcus pneumoniae* were  
484 procured from NCBI. These sequences were aligned using T-coffee tool [77]. These protein  
485 sequences were then used for generation of phylogenetic tree by Neighbor Joining analysis  
486 conducted by MEGA X [78-80]. The representation of branch lengths is in units of evolutionary  
487 distances computed by Poisson correction method [81].

488

### 489 **Statistical analysis**

490 GraphPad Software (Prism 6) was used for all the statistical analyses. The statistical  
491 tests are indicated in the figure legends and the corresponding two-tailed *t*-test or ANOVA *P*-  
492 values are reported in the graphs wherever required. \*,  $p < 0.05$ ; \*\*,  $p < 0.01$ ; \*\*\*,  $p < 0.001$  and  
493 \*\*\*\*,  $p < 0.0001$  were considered significant results. Values indicated in the graphs represent  
494 mean  $\pm$  SD, where  $n = 3$  for both the strains at each time point, unless specified otherwise in  
495 the figure legend. Error bars are indicative of SD,  $n = 3$ . All the experiments were done in  
496 biological triplicates to ensure the reproducibility of the obtained data. Real time experiments  
497 (Fig 6D) were done in biological and technical triplicates, while growth kinetics (Fig 2A, 2B  
498 and 5A) and western blot analysis (Fig 4) was done using biological triplicates. Separate flasks  
499 of the same strains are considered biological replicates, while technical replicates refer to  
500 multiple readings of the same sample.

501

## 502 **Acknowledgement**

503

504 We thank Dr. Hemlata Gautam for technical guidance in scanning electron  
505 microscopy, CSIR-IGIB, Delhi and Sandip Arya, Anurag Singh, Raj Girish Mishra and other  
506 technical staff from Transmission Electron Microscope facility AIIMS, Delhi. We would also  
507 like to thank Dr A.K. Goel, Defence Research & Development Establishment, Gwalior for  
508 providing Sap and EA1 antibody. We are grateful to Dr. Anurag Agrawal, Director, CSIR-  
509 IGIB for support and providing the required facilities.

510

## 511 **Funding**

512

513

514 This work was funded by SERB Grant No CRG/2018/000847/HS and J C Bose fellowship  
515 (SERB) to Yogendra Singh. Part of this work was done at National Institutes of Health,  
516 Bethesda, MD, USA.

517

## 518 **References**

519

- 520 1. Yang DC, Blair KM, Salama NR. Staying in Shape: the Impact of Cell Shape on  
521 Bacterial Survival in Diverse Environments. *Microbiol Mol Biol Rev.* 2016 Feb  
522 10;80(1):187-203. doi: 10.1128/MMBR.00031-15. PMID: 26864431; PMCID:  
523 PMC4771367.

- 524 2. Young KD. The selective value of bacterial shape. *Microbiol Mol Biol Rev.* 2006  
525 Sep;70(3):660-703. doi: 10.1128/MMBR.00001-06. PMID: 16959965; PMCID:  
526 PMC1594593.
- 527 3. Koehler TM. *Bacillus anthracis* physiology and genetics. *Mol Aspects Med.* 2009  
528 Dec;30(6):386-96. doi: 10.1016/j.mam.2009.07.004. PMID: 19654018; PMCID:  
529 PMC2784286.
- 530 4. Jouvion G, Corre JP, Khun H, Moya-Nilges M, Roux P, Latroche C, et al. Physical  
531 Sequestration of *Bacillus anthracis* in the Pulmonary Capillaries in Terminal  
532 Infection. *J Infect Dis.* 2016 Jul 15;214(2):281-7. doi: 10.1093/infdis/jiw098. PMID:  
533 26977051.
- 534 5. Glomski IJ, Piris-Gimenez A, Huerre M, Mock M, Goossens PL. Primary  
535 involvement of pharynx and peyer's patch in inhalational and intestinal anthrax. *PLoS*  
536 *Pathog.* 2007 Jun;3(6):e76. doi: 10.1371/journal.ppat.0030076. PMID: 17542645;  
537 PMCID: PMC1885272.
- 538 6. Saile E, Koehler TM. *Bacillus anthracis* multiplication, persistence, and genetic  
539 exchange in the rhizosphere of grass plants. *Appl Environ Microbiol.* 2006  
540 May;72(5):3168-74. doi: 10.1128/AEM.72.5.3168-3174.2006. PMID: 16672454;  
541 PMCID: PMC1472387.
- 542 7. Mock M, Fouet A. Anthrax. *Annu Rev Microbiol.* 2001;55:647-71. doi:  
543 10.1146/annurev.micro.55.1.647. PMID: 11544370.
- 544 8. Schuch R, Pelzek AJ, Kan S, Fischetti VA. Prevalence of *Bacillus anthracis*-like  
545 organisms and bacteriophages in the intestinal tract of the earthworm *Eisenia fetida*.  
546 *Appl Environ Microbiol.* 2010 Apr;76(7):2286-94. doi: 10.1128/AEM.02518-09.  
547 PMID: 20118353; PMCID: PMC2849253.

- 548 9. Schuch R, Fischetti VA. The secret life of the anthrax agent *Bacillus anthracis*:  
549 bacteriophage-mediated ecological adaptations. *PLoS One*. 2009 Aug 12;4(8):e6532.  
550 doi: 10.1371/journal.pone.0006532. PMID: 19672290; PMCID: PMC2716549.
- 551 10. Dey R, Hoffman PS, Glomski IJ. Germination and amplification of anthrax spores by  
552 soil-dwelling amoebas. *Appl Environ Microbiol*. 2012 Nov;78(22):8075-81. doi:  
553 10.1128/AEM.02034-12. PMID: 22983962; PMCID: PMC3485947.
- 554 11. Fasanella A, Scasciamacchia S, Garofolo G, Giangaspero A, Tarsitano E, Adone R.  
555 Evaluation of the house fly *Musca domestica* as a mechanical vector for an anthrax.  
556 *PLoS One*. 2010 Aug 17;5(8):e12219. doi: 10.1371/journal.pone.0012219. PMID:  
557 20808920; PMCID: PMC2923185.
- 558 12. Beatty ME, Ashford DA, Griffin PM, Tauxe RV, Sobel J. Gastrointestinal anthrax:  
559 review of the literature. *Arch Intern Med*. 2003 Nov 10;163(20):2527-31. doi:  
560 10.1001/archinte.163.20.2527. PMID: 14609791.
- 561 13. Passalacqua KD, Bergman NH. *Bacillus anthracis*: interactions with the host and  
562 establishment of inhalational anthrax. *Future Microbiol*. 2006 Dec;1(4):397-415. doi:  
563 10.2217/17460913.1.4.397. PMID: 17661631.
- 564 14. Doganay M, Metan G, Alp E. A review of cutaneous anthrax and its outcome. *J Infect*  
565 *Public Health*. 2010;3(3):98-105. doi: 10.1016/j.jiph.2010.07.004. PMID: 20869669.
- 566 15. Spencer RC. *Bacillus anthracis*. *J Clin Pathol*. 2003 Mar;56(3):182-7. doi:  
567 10.1136/jcp.56.3.182. PMID: 12610093; PMCID: PMC1769905.
- 568 16. Moayeri M, Leppla SH, Vrentas C, Pomerantsev AP, Liu S. Anthrax Pathogenesis.  
569 *Annu Rev Microbiol*. 2015;69:185-208. doi: 10.1146/annurev-micro-091014-104523.  
570 PMID: 26195305.

- 571 17. Sharma AK, Dhasmana N, Dubey N, Kumar N, Gangwal A, Gupta M, et al. Bacterial  
572 Virulence Factors: Secreted for Survival. *Indian J Microbiol.* 2017 Mar;57(1):1-10.  
573 doi: 10.1007/s12088-016-0625-1. PMID: 28148975; PMCID: PMC5243249.
- 574 18. Dhasmana N, Singh LK, Bhaduri A, Misra R, Singh Y. Recent Developments in Anti-  
575 dotes Against Anthrax. *Recent Pat Antiinfect Drug Discov.* 2014;9(2):83-96. doi:  
576 10.2174/1574891x09666140830213925. PMID: 25174439.
- 577 19. Mock M, Mignot T. Anthrax toxins and the host: a story of intimacy. *Cell Microbiol.*  
578 2003 Jan;5(1):15-23. doi: 10.1046/j.1462-5822.2003.00253.x. PMID: 12542467.
- 579 20. Moayeri M, Leppla SH. Cellular and systemic effects of anthrax lethal toxin and  
580 edema toxin. *Mol Aspects Med.* 2009 Dec;30(6):439-55. doi:  
581 10.1016/j.mam.2009.07.003. PMID: 19638283; PMCID: PMC2784088.
- 582 21. Tournier JN, Rossi Paccani S, Quesnel-Hellmann A, Baldari CT. Anthrax toxins: a  
583 weapon to systematically dismantle the host immune defenses. *Mol Aspects Med.*  
584 2009 Dec;30(6):456-66. doi: 10.1016/j.mam.2009.06.002. PMID: 19560486.
- 585 22. Ruthel G, Ribot WJ, Bavari S, Hoover TA. Time-lapse confocal imaging of  
586 development of *Bacillus anthracis* in macrophages. *J Infect Dis.* 2004 Apr  
587 1;189(7):1313-6. doi: 10.1086/382656. PMID: 15031802.
- 588 23. Glomski IJ, Corre JP, Mock M, Goossens PL. Noncapsulated toxinogenic *Bacillus*  
589 *anthracis* presents a specific growth and dissemination pattern in naive and protective  
590 antigen-immune mice. *Infect Immun.* 2007 Oct;75(10):4754-61. doi:  
591 10.1128/IAI.00575-07. PMID: 17635863; PMCID: PMC2044546.
- 592 24. Dumetz F, Jouvion G, Khun H, Glomski IJ, Corre JP, Rougeaux C, et al. Noninvasive  
593 imaging technologies reveal edema toxin as a key virulence factor in anthrax. *Am J*  
594 *Pathol.* 2011 Jun;178(6):2523-35. doi: 10.1016/j.ajpath.2011.02.027. PMID:  
595 21641378; PMCID: PMC3124019.



- 596 25. Huillet E, Bridoux L, Wanapaisan P, Rejasse A, Peng Q, Panbangred W, et al. The  
597 CodY-dependent *clhAB2* operon is involved in cell shape, chaining and autolysis in  
598 *Bacillus cereus* ATCC 14579. *PLoS One*. 2017 Oct 9;12(10):e0184975. doi:  
599 10.1371/journal.pone.0184975. PMID: 28991912; PMCID: PMC5633148.
- 600 26. Nguyen-Mau SM, Oh SY, Kern VJ, Missiakas DM, Schneewind O. Secretion genes  
601 as determinants of *Bacillus anthracis* chain length. *J Bacteriol*. 2012  
602 Aug;194(15):3841-50. doi: 10.1128/JB.00384-12. PMID: 22609926; PMCID:  
603 PMC3416568.
- 604 27. Kern VJ, Kern JW, Theriot JA, Schneewind O, Missiakas D. Surface-layer (S-layer)  
605 proteins *sap* and *EA1* govern the binding of the S-layer-associated protein *BsI*O at the  
606 cell septa of *Bacillus anthracis*. *J Bacteriol*. 2012 Aug;194(15):3833-40. doi:  
607 10.1128/JB.00402-12. Epub 2012 May 18. PMID: 22609927; PMCID: PMC3416523.
- 608 28. Anderson VJ, Kern JW, McCool JW, Schneewind O, Missiakas D. The SLH-domain  
609 protein *BsI*O is a determinant of *Bacillus anthracis* chain length. *Mol Microbiol*. 2011  
610 Jul;81(1):192-205. doi: 10.1111/j.1365-2958.2011.07688.x. PMID: 21585566;  
611 PMCID: PMC3124567.
- 612 29. Kearns DB, Losick R. Cell population heterogeneity during growth of *Bacillus*  
613 *subtilis*. *Genes Dev*. 2005 Dec 15;19(24):3083-94. doi: 10.1101/gad.1373905. PMID:  
614 16357223; PMCID: PMC1315410.
- 615 30. Ababneh QO, Herman JK. CodY Regulates SigD Levels and Activity by Binding to  
616 Three Sites in the *fla/che* Operon. *J Bacteriol*. 2015 Sep;197(18):2999-3006. doi:  
617 10.1128/JB.00288-15. PMID: 26170408; PMCID: PMC4542168.
- 618 31. Ababneh QO, Herman JK. RelA inhibits *Bacillus subtilis* motility and chaining. *J*  
619 *Bacteriol*. 2015 Jan 1;197(1):128-37. doi: 10.1128/JB.02063-14. PMID: 25331430;  
620 PMCID: PMC4288673.

- 621 32. Chai Y, Norman T, Kolter R, Losick R. An epigenetic switch governing daughter cell  
622 separation in *Bacillus subtilis*. *Genes Dev.* 2010 Apr 15;24(8):754-65. doi:  
623 10.1101/gad.1915010. PMID: 20351052; PMCID: PMC2854391.
- 624 33. Chen R, Guttenplan SB, Blair KM, Kearns DB. Role of the sigmaD-dependent  
625 autolysins in *Bacillus subtilis* population heterogeneity. *J Bacteriol.* 2009  
626 Sep;191(18):5775-84. doi: 10.1128/JB.00521-09. PMID: 19542270; PMCID:  
627 PMC2737971.
- 628 34. Mesnage S, Fontaine T, Mignot T, Delepierre M, Mock M, Fouet A. Bacterial SLH  
629 domain proteins are non-covalently anchored to the cell surface via a conserved  
630 mechanism involving wall polysaccharide pyruvylation. *EMBO J.* 2000 Sep  
631 1;19(17):4473-84. doi: 10.1093/emboj/19.17.4473. PMID: 10970841; PMCID:  
632 PMC302060.
- 633 35. Kern J, Ryan C, Faull K, Schneewind O. *Bacillus anthracis* surface-layer proteins  
634 assemble by binding to the secondary cell wall polysaccharide in a manner that  
635 requires *csaB* and *tagO*. *J Mol Biol.* 2010 Sep 3;401(5):757-75. doi:  
636 10.1016/j.jmb.2010.06.059. PMID: 20603129; PMCID: PMC4652593.
- 637 36. Lunderberg JM, Nguyen-Mau SM, Richter GS, Wang YT, Dworkin J, Missiakas DM,  
638 et al. *Bacillus anthracis* acetyltransferases PatA1 and PatA2 modify the secondary cell  
639 wall polysaccharide and affect the assembly of S-layer proteins. *J Bacteriol.* 2013  
640 Mar;195(5):977-89. doi: 10.1128/JB.01274-12. PMID: 23243307; PMCID:  
641 PMC3571321.
- 642 37. Pereira SF, Goss L, Dworkin J. Eukaryote-like serine/threonine kinases and  
643 phosphatases in bacteria. *Microbiol Mol Biol Rev.* 2011 Mar;75(1):192-212. doi:  
644 10.1128/MMBR.00042-10. PMID: 21372323; PMCID: PMC3063355.

- 645 38. Arora G, Sajid A, Arulanandh MD, Singhal A, Mattoo AR, Pomerantsev AP, et al.  
646 Unveiling the novel dual specificity protein kinases in *Bacillus anthracis*:  
647 identification of the first prokaryotic dual specificity tyrosine phosphorylation-  
648 regulated kinase (DYRK)-like kinase. *J Biol Chem*. 2012 Aug 3;287(32):26749-63.  
649 doi: 10.1074/jbc.M112.351304. PMID: 22711536; PMCID: PMC3411013.
- 650 39. Shakir SM, Bryant KM, Larabee JL, Hamm EE, Lovchik J, Lyons CR, et al.  
651 Regulatory interactions of a virulence-associated serine/threonine phosphatase-kinase  
652 pair in *Bacillus anthracis*. *J Bacteriol*. 2010 Jan;192(2):400-9. doi: 10.1128/JB.01221-  
653 09. PMID: 19915022; PMCID: PMC2805330.
- 654 40. Bryant-Hudson KM, Shakir SM, Ballard JD. Autoregulatory characteristics of a  
655 *Bacillus anthracis* serine/threonine kinase. *J Bacteriol*. 2011 Apr;193(8):1833-42. doi:  
656 10.1128/JB.01401-10. PMID: 21296958; PMCID: PMC3133050.
- 657 41. Madec E, Laszkiewicz A, Iwanicki A, Obuchowski M, Séror S. Characterization of a  
658 membrane-linked Ser/Thr protein kinase in *Bacillus subtilis*, implicated in  
659 developmental processes. *Mol Microbiol*. 2002 Oct;46(2):571-86. doi:  
660 10.1046/j.1365-2958.2002.03178.x. PMID: 12406230.
- 661 42. Shah IM, Laaberki MH, Popham DL, Dworkin J. A eukaryotic-like Ser/Thr kinase  
662 signals bacteria to exit dormancy in response to peptidoglycan fragments. *Cell*. 2008  
663 Oct 31;135(3):486-96. doi: 10.1016/j.cell.2008.08.039. PMID: 18984160; PMCID:  
664 PMC2892110.
- 665 43. Libby EA, Goss LA, Dworkin J. The Eukaryotic-Like Ser/Thr Kinase PrkC Regulates  
666 the Essential WalRK Two-Component System in *Bacillus subtilis*. *PLoS Genet*. 2015  
667 Jun 23;11(6):e1005275. doi: 10.1371/journal.pgen.1005275. PMID: 26102633;  
668 PMCID: PMC4478028.

- 669 44. Gaidenko TA, Kim TJ, Price CW. The PrpC serine-threonine phosphatase and PrkC  
670 kinase have opposing physiological roles in stationary-phase *Bacillus subtilis* cells. *J*  
671 *Bacteriol.* 2002 Nov;184(22):6109-14. doi: 10.1128/jb.184.22.6109-6114.2002.  
672 PMID: 12399479; PMCID: PMC151969.
- 673 45. Pompeo F, Foulquier E, Serrano B, Grangeasse C, Galinier A. Phosphorylation of the  
674 cell division protein GpsB regulates PrkC kinase activity through a negative feedback  
675 loop in *Bacillus subtilis*. *Mol Microbiol.* 2015 Jul;97(1):139-50. doi:  
676 10.1111/mmi.13015. PMID: 25845974.
- 677 46. Foulquier E, Pompeo F, Freton C, Cordier B, Grangeasse C, Galinier A. PrkC-  
678 mediated phosphorylation of overexpressed YvcK protein regulates PBP1 protein  
679 localization in *Bacillus subtilis* mreB mutant cells. *J Biol Chem.* 2014 Aug  
680 22;289(34):23662-9. doi: 10.1074/jbc.M114.562496. PMID: 25012659; PMCID:  
681 PMC4156092.
- 682 47. Shah IM, Dworkin J. Induction and regulation of a secreted peptidoglycan hydrolase  
683 by a membrane Ser/Thr kinase that detects muropeptides. *Mol Microbiol.* 2010  
684 Mar;75(5):1232-43. doi: 10.1111/j.1365-2958.2010.07046.x. PMID: 20070526.
- 685 48. Arora G, Sajid A, Virmani R, Singhal A, Kumar CMS, Dhasmana N, et al. Ser/Thr  
686 protein kinase PrkC-mediated regulation of GroEL is critical for biofilm formation  
687 in *Bacillus anthracis*. *NPJ Biofilms Microbiomes.* 2017 Mar 7;3:7. doi:  
688 10.1038/s41522-017-0015-4. PMID: 28649408; PMCID: PMC5460178.
- 689 49. Virmani R, Sajid A, Singhal A, Gaur M, Joshi J, Bothra A, et al. The Ser/Thr protein  
690 kinase PrkC imprints phenotypic memory in *Bacillus anthracis* spores by  
691 phosphorylating the glycolytic enzyme enolase. *J Biol Chem.* 2019 May  
692 31;294(22):8930-8941. doi: 10.1074/jbc.RA118.005424. PMID: 30952697; PMCID:  
693 PMC6552411.

- 694 50. Pompeo F, Foulquier E, Galinier A. Impact of Serine/Threonine Protein Kinases on  
695 the Regulation of Sporulation in *Bacillus subtilis*. *Front Microbiol.* 2016 Apr  
696 20;7:568. doi: 10.3389/fmicb.2016.00568. PMID: 27148245; PMCID: PMC4837961.
- 697 51. Chawla Y, Upadhyay S, Khan S, Nagarajan SN, Forti F, Nandicoori VK. Protein  
698 kinase B (PknB) of *Mycobacterium tuberculosis* is essential for growth of the  
699 pathogen in vitro as well as for survival within the host. *J Biol Chem.* 2014 May  
700 16;289(20):13858-75. doi: 10.1074/jbc.M114.563536. PMID: 24706757; PMCID:  
701 PMC4022859.
- 702 52. Pletnev P, Osterman I, Sergiev P, Bogdanov A, Dontsova O. Survival guide:  
703 *Escherichia coli* in the stationary phase. *Acta Naturae.* 2015 Oct-Dec;7(4):22-33.  
704 PMID: 26798489; PMCID: PMC4717247.
- 705 53. Mignot T, Mesnage S, Couture-Tosi E, Mock M, Fouet A. Developmental switch of  
706 S-layer protein synthesis in *Bacillus anthracis*. *Mol Microbiol.* 2002 Mar;43(6):1615-  
707 27. doi: 10.1046/j.1365-2958.2002.02852.x. PMID: 11952909.
- 708 54. Pensinger DA, Schaezner AJ, Sauer JD. Do Shoot the Messenger: PASTA Kinases as  
709 Virulence Determinants and Antibiotic Targets. *Trends Microbiol.* 2018 Jan;26(1):56-  
710 69. doi: 10.1016/j.tim.2017.06.010. PMID: 28734616; PMCID: PMC5741517.
- 711 55. Adams DW, Errington J. Bacterial cell division: assembly, maintenance and  
712 disassembly of the Z ring. *Nat Rev Microbiol.* 2009 Sep;7(9):642-53. doi:  
713 10.1038/nrmicro2198. PMID: 19680248.
- 714 56. Thakur M, Chakraborti PK. GTPase activity of mycobacterial FtsZ is impaired due to  
715 its transphosphorylation by the eukaryotic-type Ser/Thr kinase, PknA. *J Biol Chem.*  
716 2006 Dec 29;281(52):40107-13. doi: 10.1074/jbc.M607216200. PMID: 17068335.
- 717 57. Schultz C, Niebisch A, Schwaiger A, Viets U, Metzger S, Bramkamp M, et al.  
718 Genetic and biochemical analysis of the serine/threonine protein kinases PknA, PknB,

- 719 PknG and PknL of *Corynebacterium glutamicum*: evidence for non-essentiality and  
720 for phosphorylation of OdhI and FtsZ by multiple kinases. *Mol Microbiol.* 2009  
721 Nov;74(3):724-41. doi: 10.1111/j.1365-2958.2009.06897.x. PMID: 19788543;  
722 PMCID: PMC2784874.
- 723 58. Justice SS, Hunstad DA, Cegelski L, Hultgren SJ. Morphological plasticity as a  
724 bacterial survival strategy. *Nat Rev Microbiol.* 2008 Feb;6(2):162-8. doi:  
725 10.1038/nrmicro1820. PMID: 18157153.
- 726 59. Rodriguez JL, Dalia AB, Weiser JN. Increased chain length promotes pneumococcal  
727 adherence and colonization. *Infect Immun.* 2012 Oct;80(10):3454-9. doi:  
728 10.1128/IAI.00587-12. PMID: 22825449; PMCID: PMC3457561.
- 729 60. Prashar A, Bhatia S, Gigliozzi D, Martin T, Duncan C, Guyard C, et al. Filamentous  
730 morphology of bacteria delays the timing of phagosome morphogenesis in  
731 macrophages. *J Cell Biol.* 2013 Dec 23;203(6):1081-97. doi: 10.1083/jcb.201304095.  
732 PMID: 24368810; PMCID: PMC3871431.
- 733 61. Möller J, Luehmann T, Hall H, Vogel V. The race to the pole: how high-aspect ratio  
734 shape and heterogeneous environments limit phagocytosis of filamentous *Escherichia*  
735 *coli* bacteria by macrophages. *Nano Lett.* 2012 Jun 13;12(6):2901-5. doi:  
736 10.1021/nl3004896. PMID: 22591454.
- 737 62. Feinberg L, Jorgensen J, Haselton A, Pitt A, Rudner R, Margulis L. *Arthromitus*  
738 (*Bacillus cereus*) symbionts in the cockroach *Blaberus giganteus*: dietary influences  
739 on bacterial development and population density. *Symbiosis.* 1999;27(2):109-23.  
740 PMID: 11762374.
- 741 63. Margulis L, Jorgensen JZ, Dolan S, Kolchinsky R, Rainey FA, Lo SC. The  
742 *Arthromitus* stage of *Bacillus cereus*: intestinal symbionts of animals. *Proc Natl Acad*

- 743 Sci U S A. 1998 Feb 3;95(3):1236-41. doi: 10.1073/pnas.95.3.1236. PMID: 9448315;  
744 PMCID: PMC18729.
- 745 64. Manuse S, Fleurie A, Zucchini L, Lesterlin C, Grangeasse C. Role of eukaryotic-like  
746 serine/threonine kinases in bacterial cell division and morphogenesis. FEMS  
747 Microbiol Rev. 2016 Jan;40(1):41-56. doi: 10.1093/femsre/fuv041. PMID: 26429880.
- 748 65. Gerbino E, Carasi P, Mobili P, Serradell MA, Gómez-Zavaglia A. Role of S-layer  
749 proteins in bacteria. World J Microbiol Biotechnol. 2015 Dec;31(12):1877-87. doi:  
750 10.1007/s11274-015-1952-9. PMID: 26410425.
- 751 66. Sára M, Sleytr UB. S-Layer proteins. J Bacteriol. 2000 Feb;182(4):859-68. doi:  
752 10.1128/jb.182.4.859-868.2000. PMID: 10648507; PMCID: PMC94357.
- 753 67. Missiakas D, Schneewind O. Assembly and Function of the Bacillus anthracis S-  
754 Layer. Annu Rev Microbiol. 2017 Sep 8;71:79-98. doi: 10.1146/annurev-micro-  
755 090816-093512. PMID: 28622090; PMCID: PMC6190687.
- 756 68. Singh Y, Chaudhary VK, Leppla SH. A deleted variant of Bacillus anthracis  
757 protective antigen is non-toxic and blocks anthrax toxin action in vivo. J Biol Chem.  
758 1989 Nov 15;264(32):19103-7. PMID: 2509473.
- 759 69. Gupta M, Sajid A, Arora G, Tandon V, Singh Y. Forkhead-associated domain-  
760 containing protein Rv0019c and polyketide-associated protein PapA5, from substrates  
761 of serine/threonine protein kinase PknB to interacting proteins of Mycobacterium  
762 tuberculosis. J Biol Chem. 2009 Dec 11;284(50):34723-34. doi:  
763 10.1074/jbc.M109.058834. PMID: 19826007; PMCID: PMC2787335.
- 764 70. Jahn CE, Charkowski AO, Willis DK. Evaluation of isolation methods and RNA  
765 integrity for bacterial RNA quantitation. J Microbiol Methods. 2008 Oct;75(2):318-  
766 24. doi: 10.1016/j.mimet.2008.07.004. PMID: 18674572.

- 767 71. Schmitt ME, Brown TA, Trumppower BL. A rapid and simple method for preparation  
768 of RNA from *Saccharomyces cerevisiae*. *Nucleic Acids Res.* 1990 May  
769 25;18(10):3091-2. doi: 10.1093/nar/18.10.3091. PMID: 2190191; PMCID:  
770 PMC330876.
- 771 72. Yang F, Tan H, Zhou Y, Lin X, Zhang S. High-quality RNA preparation from  
772 *Rhodospiridium toruloides* and cDNA library construction therewith. *Mol*  
773 *Biotechnol.* 2011 Feb;47(2):144-51. doi: 10.1007/s12033-010-9322-1. PMID:  
774 20721646.
- 775 73. Qi Y, Patra G, Liang X, Williams LE, Rose S, Redkar RJ, et al. Utilization of the  
776 *rpoB* gene as a specific chromosomal marker for real-time PCR detection of *Bacillus*  
777 *anthracis*. *Appl Environ Microbiol.* 2001 Aug;67(8):3720-7. doi:  
778 10.1128/AEM.67.8.3720-3727.2001. PMID: 11472954; PMCID: PMC93078.
- 779 74. Dubey GP, Ben-Yehuda S. Intercellular nanotubes mediate bacterial communication.  
780 *Cell.* 2011 Feb 18;144(4):590-600. doi: 10.1016/j.cell.2011.01.015. PMID: 21335240.
- 781 75. Singh LK, Dhasmana N, Sajid A, Kumar P, Bhaduri A, Bharadwaj M, et al. *clpC*  
782 operon regulates cell architecture and sporulation in *Bacillus anthracis*. *Environ*  
783 *Microbiol.* 2015 Mar;17(3):855-65. doi: 10.1111/1462-2920.12548. PMID:  
784 24947607; PMCID: PMC4272686.
- 785 76. Sharma AK, Arora D, Singh LK, Gangwal A, Sajid A, Molle V, et al.  
786 Serine/Threonine Protein Phosphatase PstP of *Mycobacterium tuberculosis* Is  
787 Necessary for Accurate Cell Division and Survival of Pathogen. *J Biol Chem.* 2016  
788 Nov 11;291(46):24215-24230. doi: 10.1074/jbc.M116.754531. PMID: 27758870;  
789 PMCID: PMC5104944.
- 790 77. Madeira F, Park YM, Lee J, Buso N, Gur T, Madhusoodanan N, et al. The EMBL-  
791 EBI search and sequence analysis tools APIs in 2019. *Nucleic Acids Res.* 2019 Jul



- 792 2;47(W1):W636-W641. doi: 10.1093/nar/gkz268. PMID: 30976793; PMCID:  
793 PMC6602479.
- 794 78. Saitou N, Nei M. The neighbor-joining method: a new method for reconstructing  
795 phylogenetic trees. *Mol Biol Evol.* 1987 Jul;4(4):406-25. doi:  
796 10.1093/oxfordjournals.molbev.a040454. PMID: 3447015.
- 797 79. Kumar S, Stecher G, Li M, Knyaz C, Tamura K. MEGA X: Molecular Evolutionary  
798 Genetics Analysis across Computing Platforms. *Mol Biol Evol.* 2018 Jun  
799 1;35(6):1547-1549. doi: 10.1093/molbev/msy096. PMID: 29722887; PMCID:  
800 PMC5967553.
- 801 80. Stecher G, Tamura K, Kumar S. Molecular Evolutionary Genetics Analysis (MEGA)  
802 for macOS. *Mol Biol Evol.* 2020 Apr 1;37(4):1237-1239. doi:  
803 10.1093/molbev/msz312. PMID: 31904846; PMCID: PMC7086165.
- 804 81. Zuckerkandl E, Pauling L. Evolutionary Divergence and Convergence in Proteins.  
805 *Evol Genes Proteins*; Acad Press New York. 1965; 97–166. doi: org/10.1016/B978-1-  
806 4832-2734-4.50017-6.

807

808

## 809 **Supporting information**

810 **S1 Fig. Multiple sequence alignment and phylogenetic analysis of PrkC** (A) Multiple  
811 sequence alignment of PrkC in different pathogenic bacteria (*Bacillus anthracis* Sterne,  
812 *Bacillus cereus*, *Legionella pneumophila* and *Streptococcus pneumoniae*) using T-Coffee  
813 program. The symbols used in the fig are indicative of: “\*” - perfect alignment, “:” - strongly  
814 similar residues and “.” – weakly similar residues. (B) A phylogenetic tree representing the  
815 evolutionary relationship of PrkC in above-mentioned pathogens. It was generated using

816 Neighbor-Joining analysis conducted in MEGA X. The sequences used for alignment in panel  
817 A are included to generate the tree. The tree is drawn to scale with branch lengths.

818 **S1 Table. List of primers used in this study.**

819 **S2 Table. List of plasmids used in this study.**

820 **S3 Table. Bacterial strains used in this study.**

821 **S4 Table. Detailed summary statistics table for Fig 3.**

822 **S5 Table. Detailed summary statistics table for Fig 5C.**

823 **S6 Table. Detailed summary statistics table for Fig 6D.**

## 824 **Figure legends**

825

826 **Fig 1. *prkC* disruption results in bacteria with short chain length.** (A) Photograph of culture  
827 sediments in microcentrifuge tubes after standing incubation (9 hr) at room temperature of BAS  
828 WT (left) and BAS  $\Delta prkC$  (right) grown in LB media. (B) Phase contrast images of BAS WT,  
829 BAS  $\Delta prkC$  and BAS  $\Delta prkC::prkC$  strains in mid-log phase. Cells were grown in LB broth at  
830 37°C and 1 ml sample was taken from cultures in mid-log phase. Cells were pelleted and  
831 washed with PBS and visualised under 100x/1.4 oil DIC objective of Zeiss Axio Imager Z2  
832 Upright Microscope. Scale bar represents 10  $\mu$ m. (C) Scanning electron microscopy of BAS  
833 WT and BAS  $\Delta prkC$  strains in mid-log phase. Cells were grown in LB broth at 37°C and  
834 harvested in mid-log phase. These were then washed with 0.1 M sodium phosphate buffer and  
835 fixed with Karnovsky's fixative followed by 1% osmium tetroxide. A critical point drying  
836 technique was used for drying the samples followed by gold coating of 10 nm using an  
837 aluminium stubs coated with agar sputter. Cells were visualized under Zeiss Evo LS15. Scale  
838 bar represent 2  $\mu$ m, magnification-5000X.

839 **Fig 2. Effect of *prkC* disruption on chaining morphotype during different phases of**  
840 **bacterial growth.** (A) Growth kinetics of BAS WT. BAS WT strain was grown in LB broth at

841 37°C. Absorbance [OD ( $A_{600nm}$ )] was recorded at the indicated time points. Error bars denote  
842 standard deviation,  $n = 3$ . (B) Growth kinetics of BAS  $\Delta prkC$ . BAS  $\Delta prkC$  strain was grown  
843 in LB broth at 37°C. Absorbance [OD ( $A_{600nm}$ )] was recorded at the indicated time points.  
844 Error bars denote standard deviation,  $n = 3$ . (C) Phase contrast images of BAS WT and BAS  
845  $\Delta prkC$  strains at different phases of bacterial growth cycle. Cells were grown at 37°C in LB  
846 broth and 1 ml sample was harvested at time points indicated in Fig. 2A and Fig. 2B. Cells  
847 were pelleted and washed with PBS and visualised under 100x/1.4 oil DIC objective of Zeiss  
848 Axio Imager Z2 Upright Microscope. Scale bar represents 10  $\mu m$ .

849

850 **Fig 3. Quantitative analysis of chain length variation in *prkC* disruption strain.** Scatter  
851 dot plot denoting BAS WT and BAS  $\Delta prkC$  strain chain length measurement throughout  
852 bacterial growth. Phase contrast images of BAS WT and BAS  $\Delta prkC$  strains were used for  
853 measurement of the bacterial chain length using ImageJ software. Some data points in chain  
854 length quantitation (BAS WT – 2 hr, 3 hr and 4 hr) represent the maximum observable chain  
855 length obtained in the phase contrast images. Vertical and horizontal black line in the data set  
856 denotes SD and mean for both the strains at indicated time points,  $n = 50$ . These values are  
857 indicated in a separate table below the graph. Statistical significance of chain length  
858 distribution in BAS WT and BAS  $\Delta prkC$  strains was analyzed using two-way ANOVA and  
859 denoted in the graph in the form of asterisk - \*. P-values reported - \*,  $p < 0.05$ ; \*\*,  $p < 0.01$ ; \*\*\*,  
860  $p < 0.001$  and \*\*\*\*,  $p < 0.0001$  were considered significant results. Detailed summary statistics  
861 table is provided in supporting information - S4 Table.

862

863 **Fig 4. PrkC regulates the expression of Sap, BslO and EA1.** (A) Differential expression of  
864 Sap protein in BAS WT and BAS  $\Delta prkC$  strains. Equal amount of protein at different time  
865 points (2 hr, 3 hr, 4 hr, 5 hr, 6 hr, 7 hr, 8 hr, 9 hr, 10 hr, 14 hr, 18 hr, 22 hr, 26 hr and 30 hr)

866 was loaded onto SDS-PAGE, transferred onto nitrocellulose membrane and probed by Sap  
867 antibody (1:50,000) raised in rabbit. The same blot was then stripped and probed by GroEL  
868 antibody (1:50,000) raised in mice. Densitometry analysis was done using ImageLab software  
869 and the ratio of Sap w.r.t. GroEL was used to plot a graph for showing differential expression  
870 of Sap protein in the BAS WT and BAS  $\Delta prkC$  strain throughout bacterial growth. Error bars  
871 denote standard deviation,  $n = 3$ . Representative images are from one of the three independent  
872 experiments. (B) Differential expression of BslO protein in BAS WT and BAS  
873  $\Delta prkC$  strains. Equal amount of protein at different time points (2 hr, 3 hr, 4 hr, 5 hr, 6 hr, 7 hr,  
874 8 hr, 9 hr, 10 hr, 14 hr, 18 hr, 22 hr, 26 hr and 30 hr) was loaded onto SDS-PAGE, transferred  
875 onto nitrocellulose membrane and probed by BslO antibody (1:10,000) raised in mice. The  
876 same blot was then stripped and probed by GroEL antibody (1:50,000) raised in mice.  
877 Densitometry analysis was done using the ImageLab software and the ratio of BslO w.r.t.  
878 GroEL was used to plot a graph for showing differential expression of BslO protein in the BAS  
879 WT and BAS  $\Delta prkC$  strain throughout bacterial growth. Error bars denotes standard deviation,  
880  $n = 3$ . Representative images are from one of the three independent experiments. (C)  
881 Differential expression of EA1 protein in BAS WT and BAS  $\Delta prkC$  strains. Equal amount of  
882 protein at different time points (2 hr, 3 hr, 4 hr, 5 hr, 6 hr, 7 hr, 8 hr, 9 hr, 10 hr, 14 hr, 18 hr,  
883 22 hr, 26 hr and 30 hr) was loaded onto SDS-PAGE, transferred onto nitrocellulose membrane  
884 and probed by EA1 antibody (1:50,000) raised in rabbit. The same blot was then stripped and  
885 probed by GroEL antibody (1:50,000) raised in mice. Densitometry analysis was done using  
886 ImageLab software and the ratio of EA1 w.r.t. GroEL was used to plot a graph for showing  
887 differential expression of EA1 protein in the BAS WT and BAS  $\Delta prkC$  strain throughout  
888 bacterial growth. Error bars denotes standard deviation,  $n = 3$ . Representative images are from  
889 one of the three independent experiments.  
890

891 **Fig 5. *prkC* disruption results in decreased cell wall width and septa thickness.** (A) Growth  
892 kinetics of BAS WT and BAS  $\Delta prkC$  strains. Bacterial strains were grown in LB broth at 37°C  
893 till extended period of 65 hr. Absorbance [OD ( $A_{600nm}$ )] was recorded at the indicated time  
894 points. Error bars denote standard deviation,  $n = 3$ . Inset shows expanded growth profile of  
895 BAS WT and BAS  $\Delta prkC$  strains up till 6 hr. (B) Transmission electron micrographs  
896 representing the ultrastructural details of difference in cell wall thickness and septum thickness  
897 of BAS WT and BAS  $\Delta prkC$  strains. Cells were harvested at mid-log phase and primary  
898 fixation was done using Karnovsky's fixative. Secondary fixation was done using 1% osmium  
899 tetroxide and the samples were embedded into araldite resin mixture (TAAB). Scale bar  
900 represents 100 nm. (C) Bar graph representing the difference in cell wall thickness of BAS WT  
901 and BAS  $\Delta prkC$  strains. Transverse sections of around 100 mid-log phase cells of each strain  
902 was used to calculate the cell wall thickness and plotted. Statistical significance of the data set  
903 was analysed using two-tailed Student's  $t$  test and denoted in the graph in the form of asterisk  
904 - \*. P-values reported - \*,  $p < 0.05$ ; \*\*,  $p < 0.01$ ; \*\*\*,  $p < 0.001$  and \*\*\*\*,  $p < 0.0001$  were  
905 considered significant results. Detailed summary statistics table for Fig 5C is provided in  
906 supporting information - S5 Table.

907

908 **Fig 6. *prkC* disruption results in increased multi-septa formation.** (A) Representative  
909 transmission electron microscopy images of BAS WT and BAS  $\Delta prkC$  stationary phase cells  
910 showing multi- septa formation. Cells were harvested at stationary phase and primary fixation  
911 was done using Karnovsky's fixative. Secondary fixation was done using 1% osmium  
912 tetroxide and the samples were embedded into araldite resin mixture (TAAB). Scale bar  
913 represents 100 nm. (B) Staining of live bacterial cells with FM4-64 membrane stain. BAS WT  
914 and BAS  $\Delta prkC$  strains grown up to exponential phase were diluted to an initial [OD ( $A_{600nm}$ )]  
915 = 0.035 and 1 $\mu$ L was spread on agarose pad. The pads were incubated at 37°C. Cell membrane

916 was stained with FM4-64 (Final concentration of 1  $\mu\text{g/ml}$ ) and images were captured by Leica  
917 SP8 confocal microscope at 3 hr (above panel) and 12 hr (below panel). Arrows indicate the  
918 presence of multi-septa in the images. Scale bar represents 10 $\mu\text{m}$ . (C) Graph indicating ratio  
919 distribution of multi-septa formation with respect to the total number of cells in BAS WT and  
920 BAS  $\Delta\text{prkC}$  strains at 3 hr and 12 hr. Around 1500 cells were considered for calculation of  
921 each bar in the graph. (D) Comparative gene expression analysis of *ftsZ* gene in BAS  
922  $\Delta\text{prkC}$  strain as compared to BAS WT strain during mid-log and stationary phase. The data  
923 was normalized to the expression of *rpoB* from each sample. Error bar represents an average  
924 of three biological and three technical replicates. Statistical significance of *ftsZ* gene expression  
925 in BAS WT and BAS  $\Delta\text{prkC}$  strains at both the time points was analyzed using two-way  
926 ANOVA and denoted in the graph in the form of asterisk - \*. P-values reported - \*,  $p < 0.05$ ;  
927 \*\*,  $p < 0.01$ ; \*\*\*,  $p < 0.001$  and \*\*\*\*,  $p < 0.0001$  were considered significant results. Detailed  
928 summary statistics table for Fig 6D is provided in supporting information - S6 Table.  
929  
930

**Fig 1**

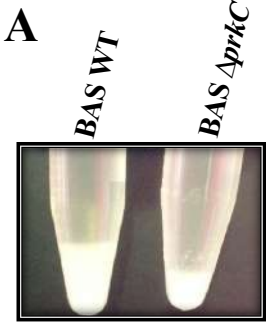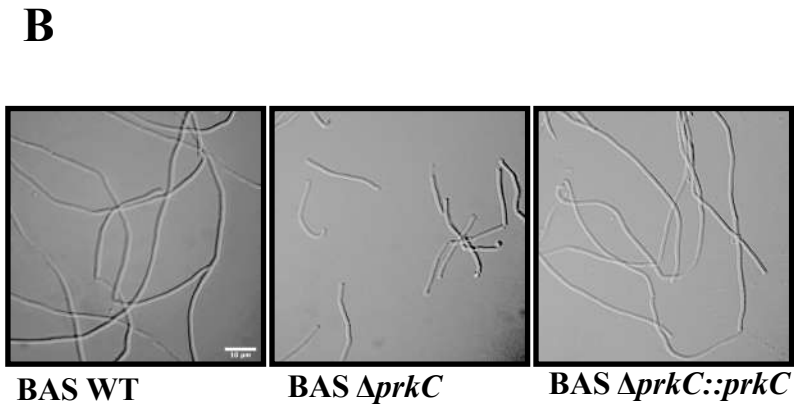

**C**

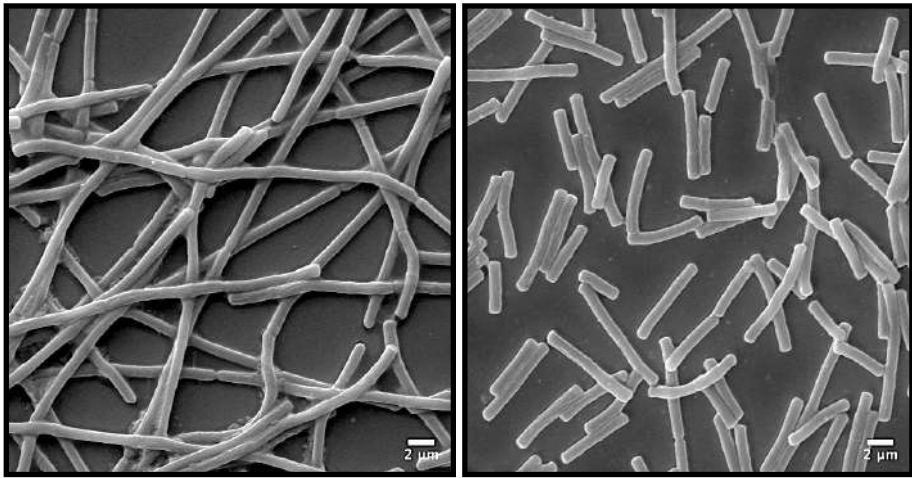

*BAS WT*

*BAS  $\Delta prkC$*







**Fig 3**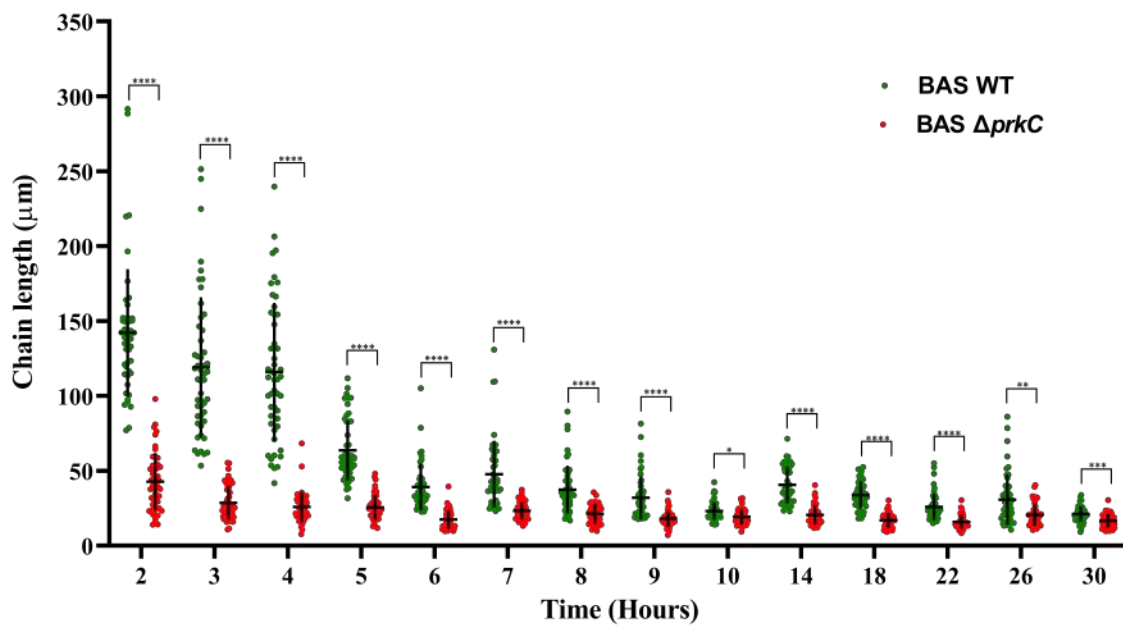

| Time (Hours) | BAS WT    |         | BAS $\Delta prkC$ |         |
|--------------|-----------|---------|-------------------|---------|
|              | Mean (µm) | SD      | Mean (µm)         | SD      |
| 2            | 142.1084  | 42.6069 | 42.6963           | 19.1364 |
| 3            | 119.02844 | 46.8723 | 28.64966          | 11.3389 |
| 4            | 115.90408 | 46.2711 | 25.8465           | 9.9983  |
| 5            | 63.53988  | 20.1150 | 25.55476          | 8.3986  |
| 6            | 39.13004  | 15.5104 | 17.339            | 6.2770  |
| 7            | 47.77336  | 22.3645 | 23.18334          | 5.6947  |
| 8            | 37.32332  | 16.0714 | 21.22696          | 6.4880  |
| 9            | 31.93754  | 14.3880 | 18.00352          | 5.2235  |
| 10           | 23.02086  | 5.8793  | 19.27986          | 4.8745  |
| 14           | 40.57046  | 12.1721 | 20.49596          | 6.3195  |
| 18           | 33.85694  | 8.9581  | 16.8685           | 5.0875  |
| 22           | 25.77132  | 8.8618  | 15.8682           | 4.6959  |
| 26           | 30.69216  | 16.8488 | 20.43188          | 7.2795  |
| 30           | 21.10478  | 5.2186  | 16.62496          | 4.4415  |

**Fig 4**

**A**

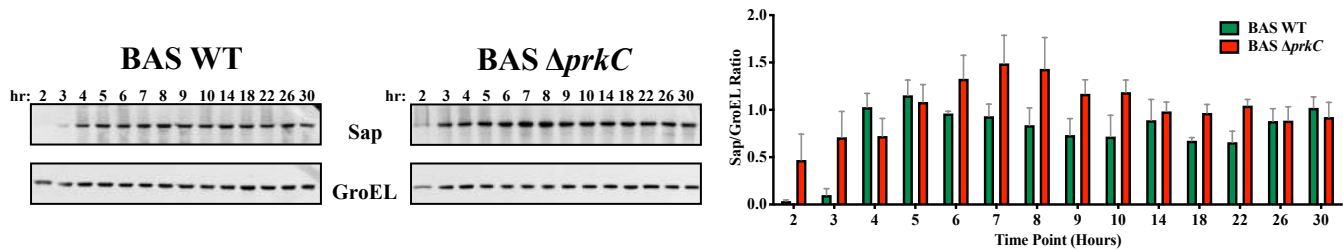

**B**

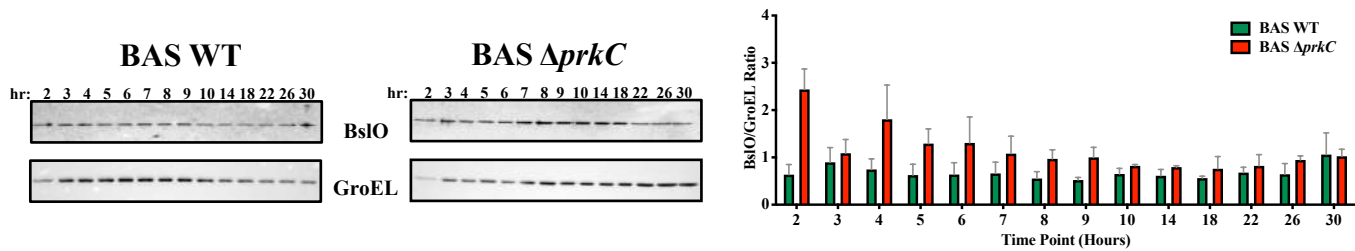

**C**

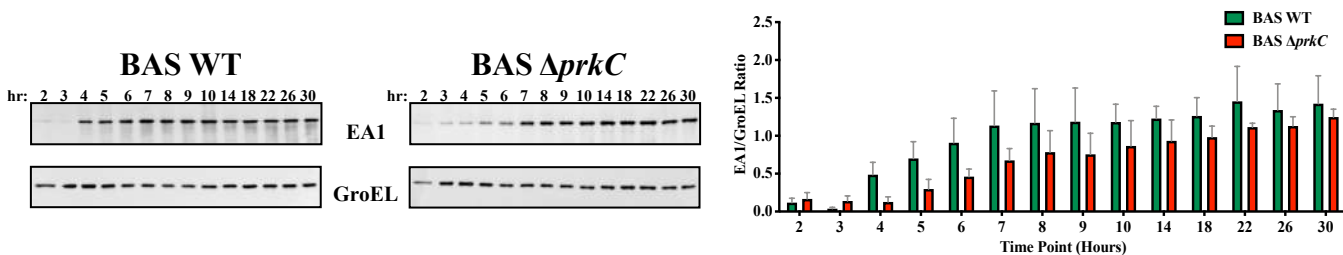

**Fig 5**

**A**

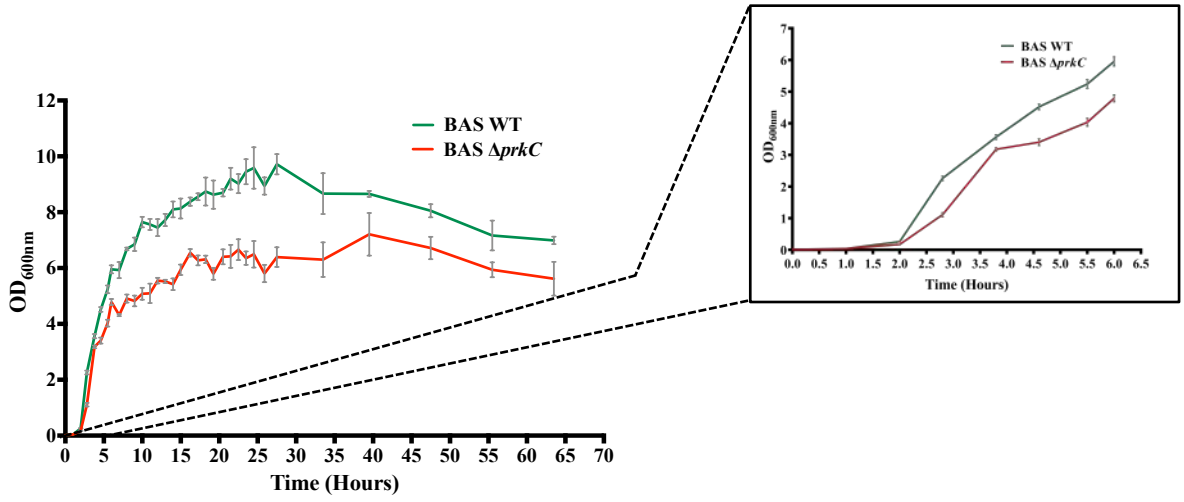

**B**

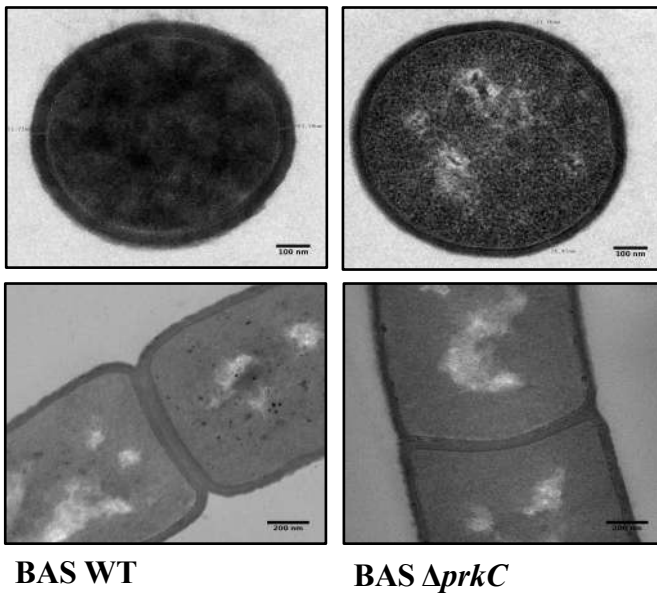

**C**

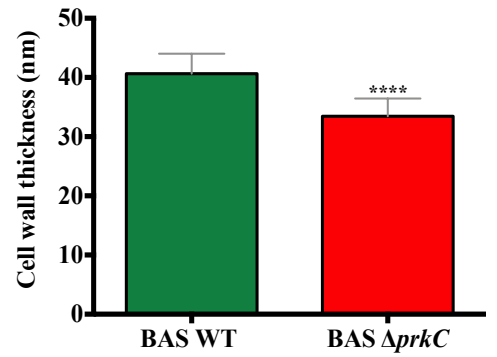

**Fig 6**

**A**

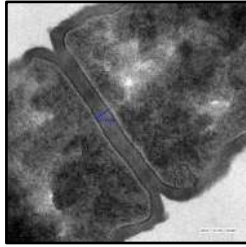

**BAS WT**

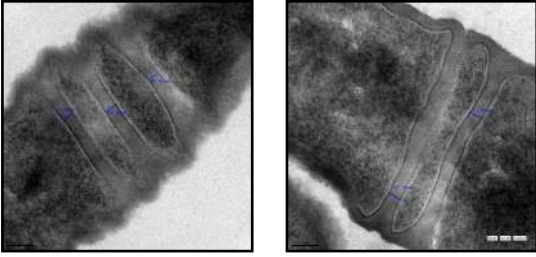

**BAS  $\Delta prkC$**

**B**

**3 Hours**

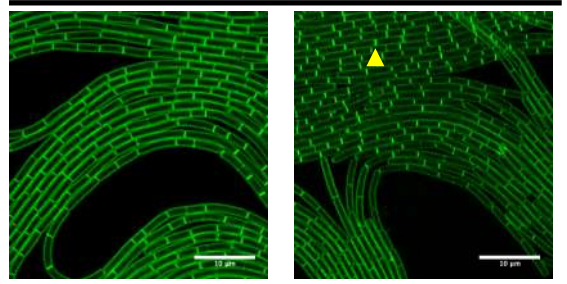

**BAS WT**

**BAS  $\Delta prkC$**

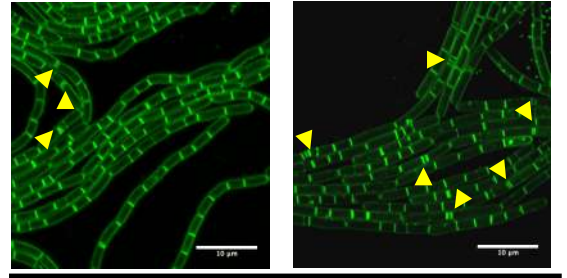

**12 Hours**

**C**

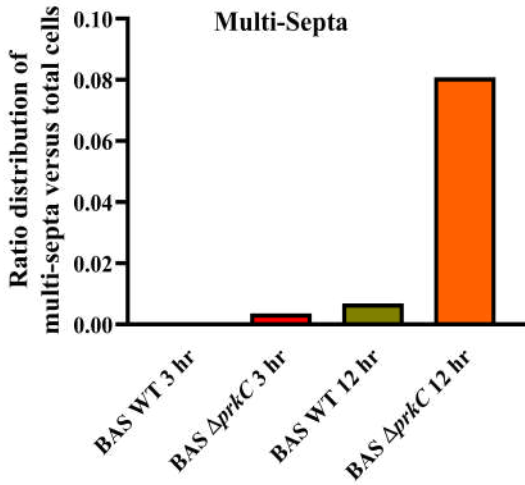

**D**

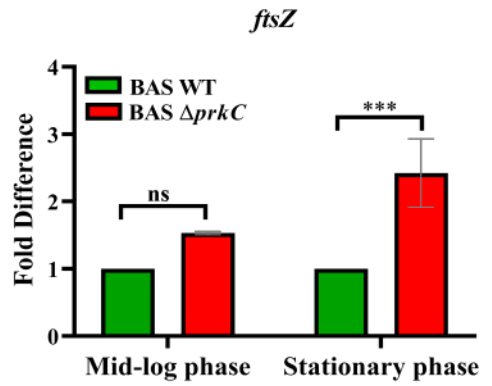



# S1 Table

| <b>S1 Table. List of primers used in this study</b> |                        |                                       |
|-----------------------------------------------------|------------------------|---------------------------------------|
| <b>S. No</b>                                        | <b>Primer Name</b>     | <b>Primer sequence 5' → 3'</b>        |
| <b>Real time PCR primers</b>                        |                        |                                       |
| P1                                                  | BAS 3757_ftsZ RT FP    | TGCCTCTAACATTGGCGTGT                  |
| P2                                                  | BAS 3757_ftsZ RT RP    | CAAGCGGCATCTGGTATTGC                  |
| P3                                                  | BAS0102_rpoB_RT_FP     | AACTTGCGCACATGGTTGAC                  |
| P4                                                  | BAS0102_rpoB_RT_RP     | CTGTCCACCGAACTGAGCTT                  |
| <b>Primers for Protein Purification</b>             |                        |                                       |
| P5                                                  | BAS0841 Fp (BamHI)     | GGGGGATCCCCATGGCAAAGACTAACTC          |
| P6                                                  | BAS0841 Rp (XhoI)      | GGGCTCGAGATTATTTTGTTCAGGTTTTGC        |
| P7                                                  | BAS0842 Fp (BamHI)     | CCCGGATCCCCATGGCAAAGACTAACTCTTAC      |
| P8                                                  | BAS0842 Rp (XhoI)      | GGGCTCGAGTTATAGATTTGGGTTATTAAG        |
| P9                                                  | BAS0253_groEL_BamHI_FP | AATCCAAGGGGGTGGATCCTTATGGCAAAG        |
| P10                                                 | BAS0253_groEL_XhoI_RP  | TTAGGGCAAACCTCGAGTTACATCATTCCGCC      |
| P11                                                 | BAS1683 FP (EcoRI)     | CCCGAATTCATGAAAAAGTTATTCTAATGTG       |
| P12                                                 | BAS1683 RP (XhoI)      | CCCCTCGAGTTGTATTTTTAAGTTCTTCTCAATGTCC |
| <b>Primers for complement strain generation</b>     |                        |                                       |
| P13                                                 | Prkc Spe1 Fp           | CCACTAGTCGTGCTGATTGGAAAACGCTTAAATG    |
| P14                                                 | Prkc BamH1 Rp          | CCGGATCCTTATTGTGTTGGATATGGTACTTCTTTG  |
| P15                                                 | PrkC Promoter Kpn1 Fp  | CCGGTACCATTGTCGGTCGTGGTACAGAACTG      |
| P16                                                 | PrkC promoter Spe1 Rp  | CCACTAGTATGGCTCGTCCTCTTCTTTTC         |

## S2 Table

| <b>S2 Table. List of plasmids used in this study</b> |                                                                                                                |                              |                  |
|------------------------------------------------------|----------------------------------------------------------------------------------------------------------------|------------------------------|------------------|
| <b>Name</b>                                          | <b>Description</b>                                                                                             | <b>Resistance<br/>Marker</b> | <b>Reference</b> |
| pYS5                                                 | Plasmid used for complementation in <i>B. anthracis</i> ; AmpR in <i>E. coli</i> ; KanR in <i>B. anthracis</i> | Kanamycin,<br>Ampicillin     | [68]             |
| pYS5-prkC*                                           | Plasmid expressing PrkC under own promoter in <i>B. anthracis</i>                                              | Ampicillin,<br>Spectinomycin | This study       |
| pProExHTc                                            | <i>E. coli</i> expression vector with N-terminal His <sub>6</sub> -tag                                         | Ampicillin                   | Invitrogen       |
| pET28a                                               | <i>E. coli</i> expression vector with N and C-terminal His <sub>6</sub> -tag                                   | Kanamycin                    | Invitrogen       |
| pProExHTc-sap                                        | Expression of His <sub>6</sub> -Sap in <i>E. coli</i>                                                          | Ampicillin                   | This study       |
| pProExHTc-eag                                        | Expression of His <sub>6</sub> -EA1 in <i>E. coli</i>                                                          | Ampicillin                   | This study       |
| pProExHTc-groEL                                      | Expression of His <sub>6</sub> -GroEL in <i>E. coli</i>                                                        | Ampicillin                   | This study       |
| pET28a-bslo                                          | Expression of His <sub>6</sub> -BslO in <i>E. coli</i>                                                         | Kanamycin                    | This study       |

## S3 Table

| <b>S3 Table. Bacterial strains used in this study</b> |                                                                                                                                                                                                                                                                                            |                             |                  |
|-------------------------------------------------------|--------------------------------------------------------------------------------------------------------------------------------------------------------------------------------------------------------------------------------------------------------------------------------------------|-----------------------------|------------------|
| <b>Name</b>                                           | <b>Genotype</b>                                                                                                                                                                                                                                                                            | <b>Resistance marker</b>    | <b>Reference</b> |
| DH5 $\alpha$                                          | <i>E. coli</i> F <sup>-</sup> <i>endA1 glnV44 thi-1 recA1 relA1 gyrA96 deoR nupG purB20</i><br>$\phi$ 80 <i>lacZ</i> $\Delta$ M15 $\Delta$ ( <i>lacZYA-argF</i> )U169,<br><i>hsdR17</i> ( <i>r<sub>K</sub><sup>-</sup>m<sub>K</sub><sup>+</sup></i> ), $\lambda$ <sup>-</sup>              | -                           | Invitrogen       |
| BL21(DE3)                                             | <i>E. coli</i> B strain: F <sup>-</sup><br><i>ompT gal dcm lon hsdS<sub>B</sub></i> ( <i>r<sub>B</sub><sup>-</sup>m<sub>B</sub><sup>-</sup></i> ) $\lambda$ (DE3<br>[ <i>lacI lacUV5-T7p07 ind1 sam7 nin5</i> ])<br>[ <i>malB<sup>+</sup></i> ] <sub>K-12</sub> ( $\lambda$ <sup>S</sup> ) | -                           | Invitrogen       |
| SCS110                                                | <i>E. coli</i> SCS110 is an <i>endA</i> <sup>-</sup> derivative of the JM110 strain <i>rpsL</i> (Strr) <i>thr leu endA thi-1 lacY galK galT ara tonA tsx dam dcm supE44</i> $\Delta$ ( <i>lac-proAB</i> ) [F' <i>traD36 proAB lacIqZ</i> $\Delta$ M15].                                    | -                           | Stratagene       |
| <i>B. anthracis</i><br>Sterne 34F2<br>(BAS WT)        | <i>B. anthracis</i> strain pXO1 <sup>+</sup> , pXO2 <sup>-</sup>                                                                                                                                                                                                                           | -                           | NIAID, NIH       |
| BAS $\Delta$ <i>prkC</i>                              | <i>B. anthracis</i> Sterne:: <i>prkC</i>                                                                                                                                                                                                                                                   | Kanamycin                   | [42]             |
| BAS<br>$\Delta$ <i>prkC</i> :: <i>prkC</i>            | <i>B. anthracis</i> Sterne:: <i>prkC</i> + <i>prkC</i>                                                                                                                                                                                                                                     | Kanamycin,<br>Spectinomycin | This study       |



## S4 Table

| <b>Fig 3 : Summary statistics</b>          |                         |                |                   |
|--------------------------------------------|-------------------------|----------------|-------------------|
| <b>BAS WT-BAS <math>\Delta prkC</math></b> | <b>95%</b>              |                | <b>Adjusted P</b> |
| <b>(Hours)</b>                             | <b>CI of Difference</b> | <b>Summary</b> | <b>Values</b>     |
| 2                                          | 79.53 to 119.3          | ****           | <0.0001           |
| 3                                          | 69.67 to 111.1          | ****           | <0.0001           |
| 4                                          | 69.71 to 110.4          | ****           | <0.0001           |
| 5                                          | 28.69 to 47.28          | ****           | <0.0001           |
| 6                                          | 14.65 to 28.93          | ****           | <0.0001           |
| 7                                          | 14.68 to 34.50          | ****           | <0.0001           |
| 8                                          | 8.703 to 23.49          | ****           | <0.0001           |
| 9                                          | 7.393 to 20.47          | ****           | <0.0001           |
| 10                                         | 0.5219 to 6.960         | *              | 0.0112            |
| 14                                         | 14.25 to 25.90          | ****           | <0.0001           |
| 18                                         | 12.62 to 21.36          | ****           | <0.0001           |
| 22                                         | 5.646 to 14.16          | ****           | <0.0001           |
| 26                                         | 2.440 to 18.08          | **             | 0.0026            |
| 30                                         | 1.592 to 7.368          | ***            | 0.0002            |

## S5 Table

| <b>Fig 5C : Summary statistics</b> |                |
|------------------------------------|----------------|
|                                    | <b>Values</b>  |
| P Value                            | <0.0001        |
| Summary                            | ****           |
| BAS WT Mean (nm)                   | 40.63          |
| BAS $\Delta prkC$ Mean (nm)        | 33.44          |
| 95% CI                             | 8.101 to 6.276 |
| R squared (eta squared)            | 0.5597         |

## S6 Table

| <b>Fig 6D : Summary statistics</b>          |                                 |                |                              |
|---------------------------------------------|---------------------------------|----------------|------------------------------|
| <b>BAS WT- BAS <math>\Delta prkC</math></b> | <b>95% CI of<br/>Difference</b> | <b>Summary</b> | <b>Adjusted P<br/>Values</b> |
| Mid-log phase                               | -1.102 to 0.03703               | ns             | 0.0657                       |
| Stationary phase                            | -1.991 to -0.8526               | ***            | 0.0003                       |
